# Supplementary material for: Cannulated screws versus dynamic hip screw versus hemiarthroplasty versus total hip arthroplasty in patients with displaced and non-displaced femoral neck fractures: a systematic review and frequentist network meta-analysis of 5703 patients
Source: Springer Nature journal article supplement (doi:10.1186/s13018-023-04114-8), 2023-08-26

|                                                                                                                  | Mean (SD) / Patients       | Mean (SD) / Patients       | MD (95% CI)                    |
|------------------------------------------------------------------------------------------------------------------|----------------------------|----------------------------|--------------------------------|
| DHS vs CS<br>Mjorud et al. 2006                                                                                  | 40.0 ( 22.0 ) / 58         | 40.0 ( 19.0 ) / 40         | 0.00 ( -8.17 ; 8.17 )          |
| HA vs CS<br>Frihagen et al. 2007                                                                                 | 76.0 ( 19.0 ) / 110        | 26.0 ( 20.2 ) / 112        | 50.00 ( 44.84 ; 55.16 )        |
| Parker et al. 2002                                                                                               | 46.4 ( 1.8 ) / 229         | 24.2 ( 9.2 ) / 226         | 22.20 ( 20.98 ; 23.42 )        |
| Roden et al. 2003                                                                                                | 58.0 ( 20.3 ) / 47         | 18.0 ( 15.8 ) / 53         | 40.00 ( 32.79 ; 47.21 )        |
| <b>Fixed effects model</b>                                                                                       | <b>56.2 ( 18.0 ) / 386</b> | <b>23.9 ( 14.3 ) / 391</b> | <b>24.11 ( 22.94 ; 25.28 )</b> |
| <b>Random effects model</b>                                                                                      | <b>56.2 ( 18.0 ) / 386</b> | <b>23.9 ( 14.3 ) / 391</b> | <b>37.27 ( 17.47 ; 57.08 )</b> |
| <i>Heterogeneity: I<sup>2</sup> = 98 %, t<sup>2</sup> = 299.5 , X<sup>2</sup> ( 2 ) = 124.85 , p &lt; 0.001</i>  |                            |                            |                                |
| THA vs CS<br>Tidermark et al. 2002                                                                               | 102.0 ( 28.8 ) / 49        | 20.0 ( 15.8 ) / 53         | 82.00 ( 72.89 ; 91.11 )        |
| HA vs DHS<br>van Vugt et al. 1993                                                                                | 80.2 ( 19.0 ) / 22         | 65.5 ( 14.0 ) / 21         | 14.70 ( 4.76 ; 24.64 )         |
| THA vs HA<br>Avery et al. 2011                                                                                   | 93.0 ( 28.8 ) / 40         | 78.0 ( 20.3 ) / 41         | 15.00 ( 4.12 ; 25.88 )         |
| Blomfeldt et al. 2007                                                                                            | 102.0 ( 28.8 ) / 60        | 78.0 ( 20.3 ) / 60         | 24.00 ( 15.08 ; 32.92 )        |
| Cadossi et al. 2013                                                                                              | 75.4 ( 28.8 ) / 47         | 81.0 ( 20.3 ) / 49         | -5.60 ( -15.61 ; 4.41 )        |
| Chammout et al. 2019                                                                                             | 99.0 ( 25.0 ) / 60         | 77.0 ( 19.0 ) / 60         | 22.00 ( 14.05 ; 29.95 )        |
| Iorio et al. 2019                                                                                                | 59.0 ( 28.8 ) / 30         | 48.0 ( 20.3 ) / 30         | 11.00 ( -1.61 ; 23.61 )        |
| Macaulay et al. 2007                                                                                             | 89.1 ( 35.8 ) / 17         | 82.0 ( 35.1 ) / 23         | 7.10 ( -15.16 ; 29.36 )        |
| Parker et al. 2019                                                                                               | 83.9 ( 28.8 ) / 52         | 52.0 ( 20.3 ) / 53         | 31.90 ( 22.35 ; 41.45 )        |
| Schleicher et al. 2003                                                                                           | 84.0 ( 28.8 ) / 54         | 72.0 ( 20.3 ) / 52         | 12.00 ( 2.54 ; 21.46 )         |
| Sharma et al. 2016                                                                                               | 45.0 ( 28.8 ) / 40         | 35.0 ( 20.3 ) / 40         | 10.00 ( -0.92 ; 20.92 )        |
| Sonaje et al. 2018                                                                                               | 119.1 ( 16.8 ) / 21        | 51.8 ( 8.7 ) / 21          | 67.30 ( 59.23 ; 75.37 )        |
| Ukaj et al. 2019                                                                                                 | 63.7 ( 5.3 ) / 47          | 57.8 ( 5.0 ) / 49          | 5.95 ( 3.90 ; 8.00 )           |
| <b>Fixed effects model</b>                                                                                       | <b>82.9 ( 32.4 ) / 468</b> | <b>66.1 ( 24.6 ) / 478</b> | <b>11.27 ( 9.56 ; 12.99 )</b>  |
| <b>Random effects model</b>                                                                                      | <b>82.9 ( 32.4 ) / 468</b> | <b>66.1 ( 24.6 ) / 478</b> | <b>18.53 ( 6.57 ; 30.50 )</b>  |
| <i>Heterogeneity: I<sup>2</sup> = 96 %, t<sup>2</sup> = 379.0 , X<sup>2</sup> ( 10 ) = 255.24 , p &lt; 0.001</i> |                            |                            |                                |
| <b>NETWORK META-ANALYSIS</b>                                                                                     |                            |                            |                                |
| <b>Fixed effects model</b>                                                                                       |                            |                            |                                |
| CS                                                                                                               | 24.8 ( 15.6 ) / 484        |                            | -37.61 ( -39.64 ; -35.59 )     |
| DHS                                                                                                              | 46.8 ( 23.1 ) / 79         |                            | -33.56 ( -40.13 ; -26.99 )     |
| HA                                                                                                               | 62.2 ( 22.5 ) / 886        |                            | -12.85 ( -14.54 ; -11.16 )     |
| THA                                                                                                              | 84.7 ( 32.5 ) / 517        |                            | 0.00 ( Reference )             |
| <b>Random effects model</b>                                                                                      |                            |                            |                                |
| CS                                                                                                               | 24.8 ( 15.6 ) / 484        |                            | -60.61 ( -80.98 ; -40.24 )     |
| DHS                                                                                                              | 46.8 ( 23.1 ) / 79         |                            | -48.05 ( -79.02 ; -17.08 )     |
| HA                                                                                                               | 62.2 ( 22.5 ) / 886        |                            | -20.52 ( -32.06 ; -8.98 )      |
| THA                                                                                                              | 84.7 ( 32.5 ) / 517        |                            | 0.00 ( Reference )             |
| <i>Heterogeneity: I<sup>2</sup> = 97 %, t<sup>2</sup> = 378.5 , X<sup>2</sup> ( 12 ) = 380.09 , p &lt; 0.001</i> |                            |                            |                                |
| <i>Consistency: X<sup>2</sup> ( 2 ) = 97.89 , p &lt; 0.001</i>                                                   |                            |                            |                                |

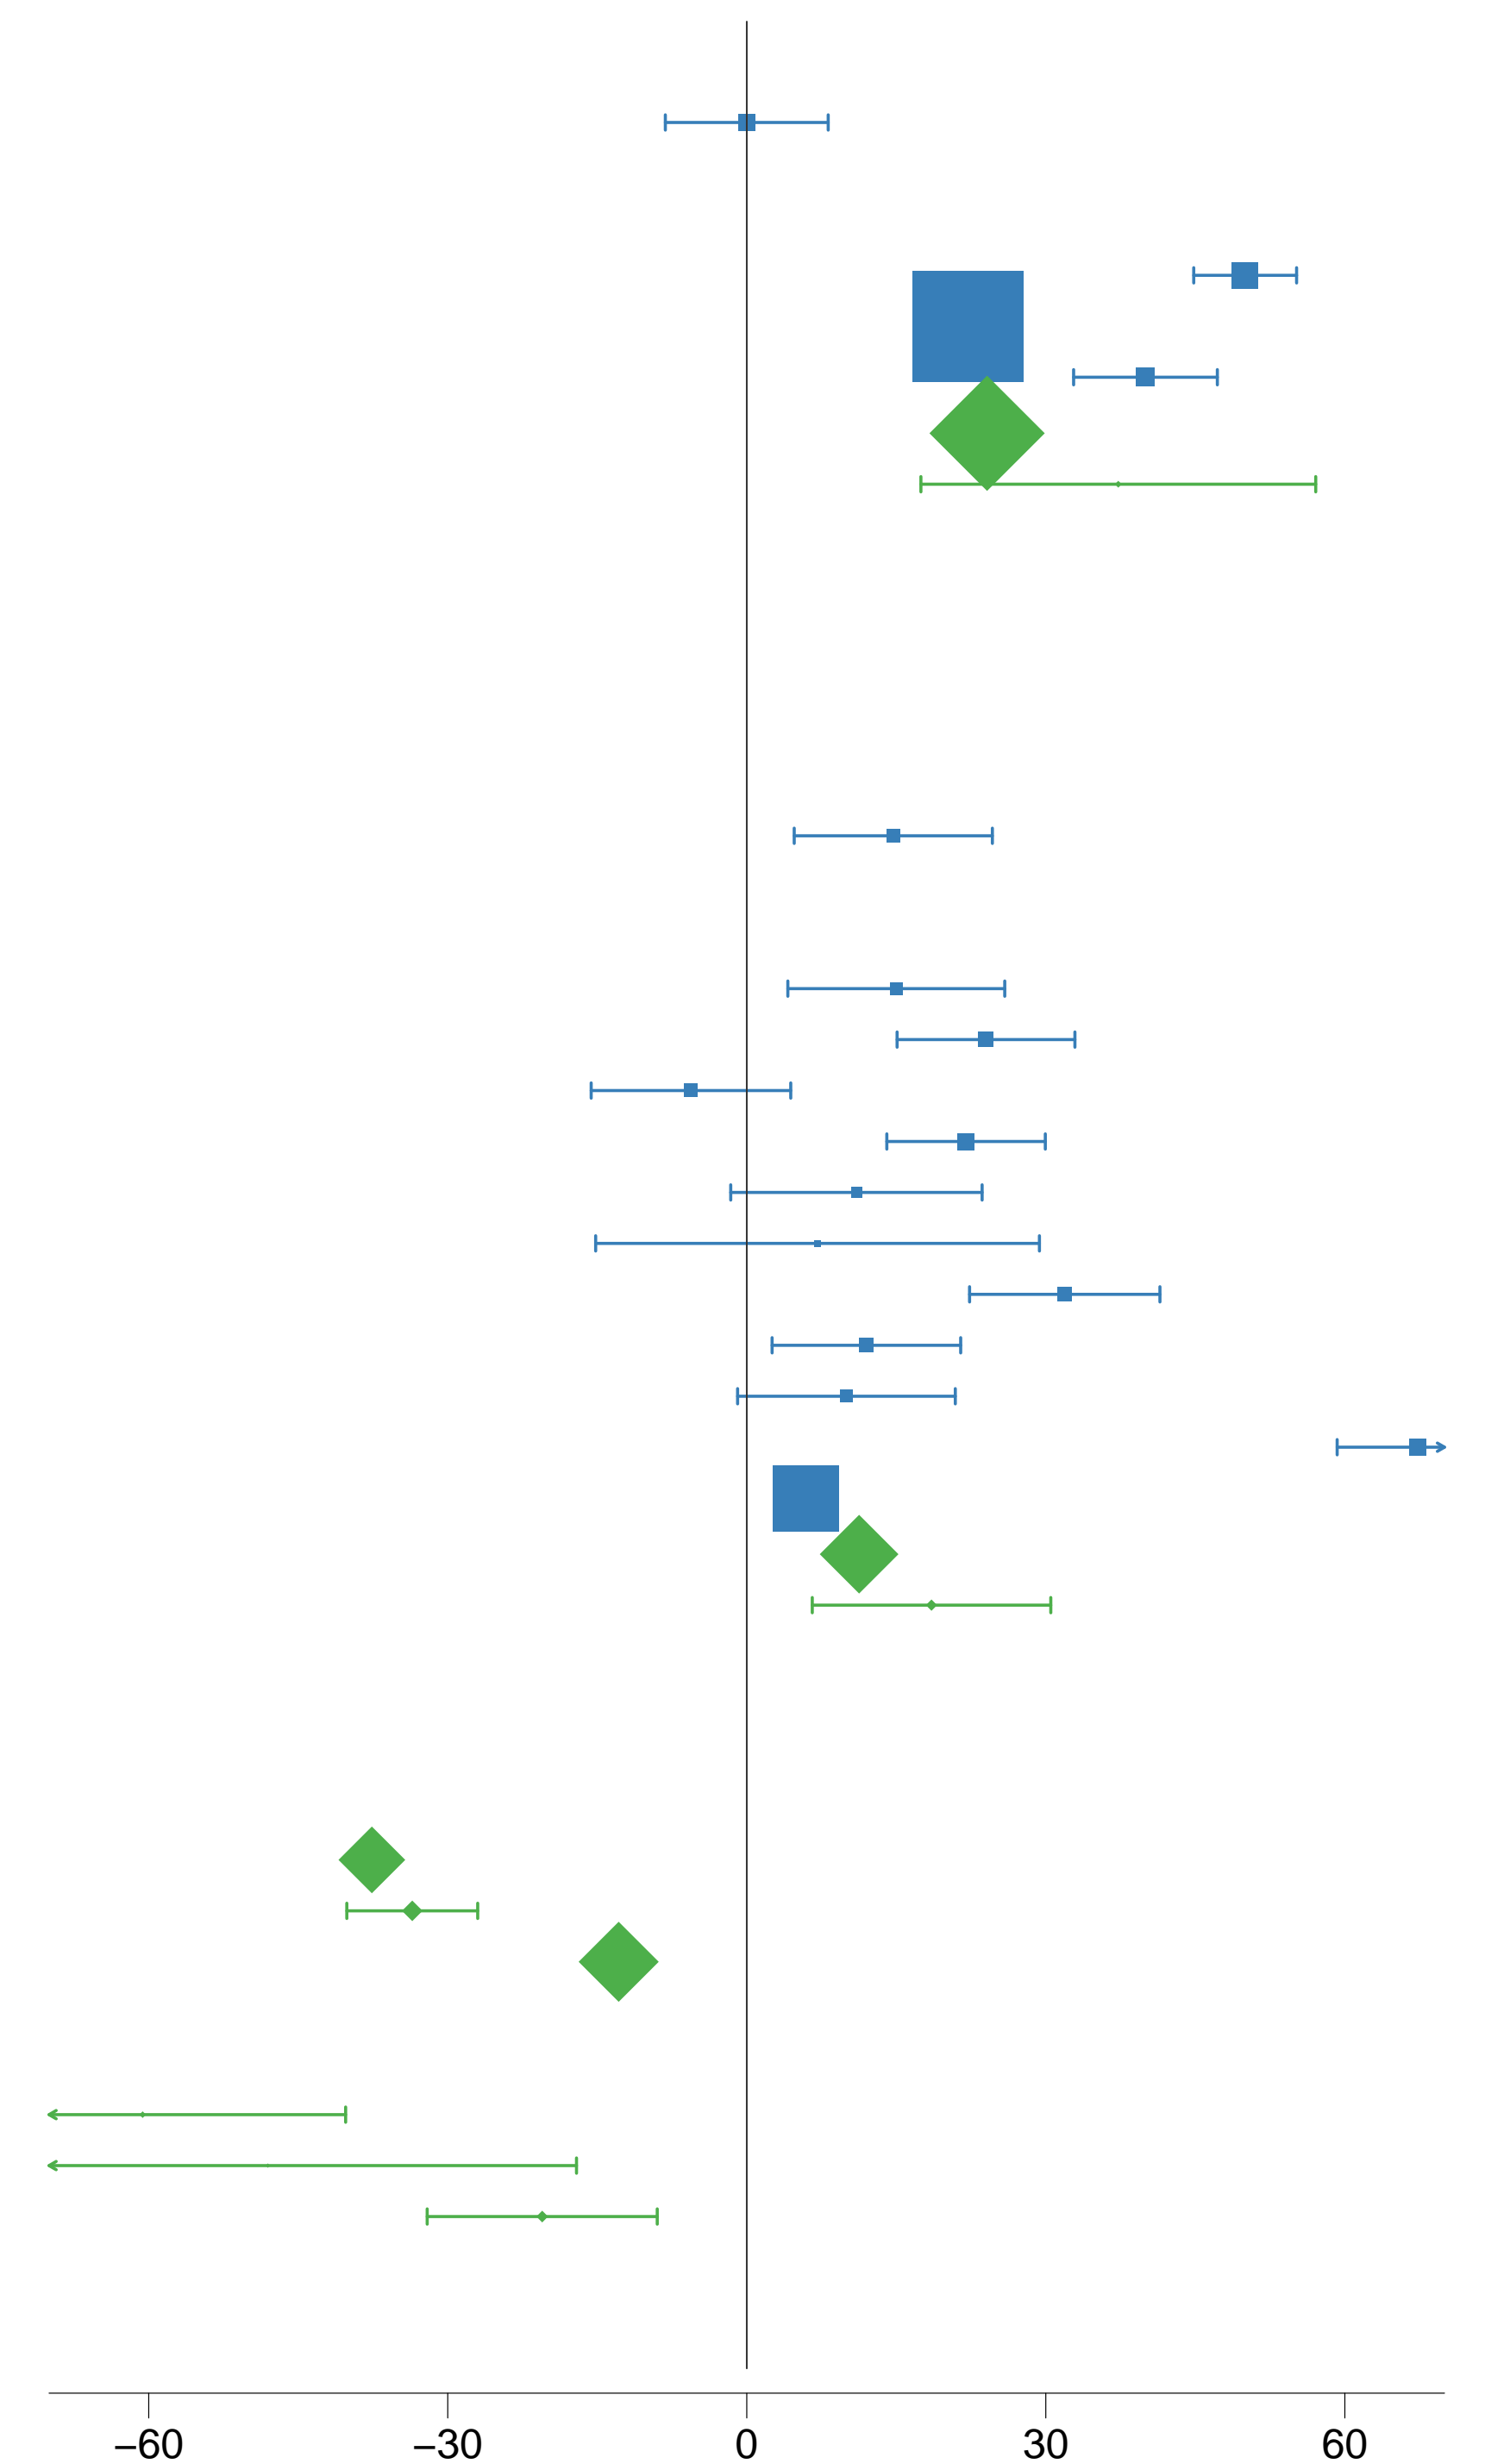

Supplement: MOESM3 [file 25967174]
