# Supplementary material for: Cannulated screws versus dynamic hip screw versus hemiarthroplasty versus total hip arthroplasty in patients with displaced and non-displaced femoral neck fractures: a systematic review and frequentist network meta-analysis of 5703 patients
Source: Springer Nature journal article supplement (doi:10.1186/s13018-023-04114-8), 2023-08-26

|                                                                                                               | Mean (SD) / Patients     | Mean (SD) / Patients     | MD (95% CI)                 |
|---------------------------------------------------------------------------------------------------------------|--------------------------|--------------------------|-----------------------------|
| <b>HA vs CS</b>                                                                                               |                          |                          |                             |
| Frihagen et al. 2007                                                                                          | 3.5 ( 2.0 ) / 110        | 0.3 ( 0.9 ) / 112        | 3.13 ( 2.72 ; 3.54 )        |
| Parker et al. 2002                                                                                            | 1.8 ( 1.1 ) / 229        | 0.3 ( 0.2 ) / 226        | 1.49 ( 1.34 ; 1.64 )        |
| <b>Fixed effects model</b>                                                                                    | <b>2.3 ( 1.7 ) / 339</b> | <b>0.3 ( 0.5 ) / 338</b> | <b>1.68 ( 1.54 ; 1.82 )</b> |
| <b>Random effects model</b>                                                                                   | <b>2.3 ( 1.7 ) / 339</b> | <b>0.3 ( 0.5 ) / 338</b> | <b>2.30 ( 0.69 ; 3.91 )</b> |
| <i>Heterogeneity: I<sup>2</sup> = 98 %, t<sup>2</sup> = 1.3 , X<sup>2</sup> ( 1 ) = 53.53 , p &lt; 0.001</i>  |                          |                          |                             |
| <b>THA vs CS</b>                                                                                              |                          |                          |                             |
| Tidermark et al. 2002                                                                                         | 5.5 ( 1.6 ) / 49         | 0.2 ( 0.5 ) / 53         | 5.30 ( 4.83 ; 5.77 )        |
| <b>HA vs DHS</b>                                                                                              |                          |                          |                             |
| van Vugt et al. 1993                                                                                          | 4.0 ( 1.6 ) / 22         | 2.0 ( 1.6 ) / 21         | 2.00 ( 1.04 ; 2.96 )        |
| <b>THA vs HA</b>                                                                                              |                          |                          |                             |
| Blomfeldt et al. 2007                                                                                         | 4.6 ( 1.6 ) / 60         | 3.2 ( 1.6 ) / 60         | 1.40 ( 0.83 ; 1.97 )        |
| Chammout et al. 2019                                                                                          | 3.5 ( 2.0 ) / 60         | 3.2 ( 2.2 ) / 60         | 0.31 ( -0.44 ; 1.06 )       |
| Parker et al. 2019                                                                                            | 3.4 ( 1.6 ) / 52         | 2.4 ( 1.6 ) / 53         | 0.91 ( 0.30 ; 1.52 )        |
| Schleicher et al. 2003                                                                                        | 6.0 ( 1.6 ) / 54         | 4.0 ( 1.6 ) / 52         | 2.00 ( 1.39 ; 2.61 )        |
| Sharma et al. 2016                                                                                            | 3.0 ( 1.6 ) / 40         | 2.0 ( 1.6 ) / 40         | 1.00 ( 0.30 ; 1.70 )        |
| Sonaje et al. 2018                                                                                            | 3.4 ( 0.2 ) / 21         | 2.4 ( 0.2 ) / 21         | 0.99 ( 0.85 ; 1.12 )        |
| Ukaj et al. 2019                                                                                              | 1.8 ( 0.2 ) / 47         | 1.6 ( 0.3 ) / 49         | 0.19 ( 0.10 ; 0.28 )        |
| <b>Fixed effects model</b>                                                                                    | <b>3.8 ( 2.0 ) / 334</b> | <b>2.8 ( 1.7 ) / 335</b> | <b>0.49 ( 0.42 ; 0.57 )</b> |
| <b>Random effects model</b>                                                                                   | <b>3.8 ( 2.0 ) / 334</b> | <b>2.8 ( 1.7 ) / 335</b> | <b>0.95 ( 0.47 ; 1.43 )</b> |
| <i>Heterogeneity: I<sup>2</sup> = 95 %, t<sup>2</sup> = 0.3 , X<sup>2</sup> ( 6 ) = 131.56 , p &lt; 0.001</i> |                          |                          |                             |
| <b>NETWORK META-ANALYSIS</b>                                                                                  |                          |                          |                             |
| <b>Fixed effects model</b>                                                                                    |                          |                          |                             |
| CS                                                                                                            | 0.3 ( 0.5 ) / 391        |                          | -2.50 ( -2.65 ; -2.35 )     |
| DHS                                                                                                           | 2.0 ( 1.6 ) / 21         |                          | -2.56 ( -3.52 ; -1.60 )     |
| HA                                                                                                            | 2.6 ( 1.7 ) / 696        |                          | -0.56 ( -0.64 ; -0.49 )     |
| THA                                                                                                           | 4.0 ( 2.0 ) / 383        |                          | 0.00 ( Reference )          |
| <b>Random effects model</b>                                                                                   |                          |                          |                             |
| CS                                                                                                            | 0.3 ( 0.5 ) / 391        |                          | -4.04 ( -5.13 ; -2.95 )     |
| DHS                                                                                                           | 2.0 ( 1.6 ) / 21         |                          | -3.15 ( -5.20 ; -1.10 )     |
| HA                                                                                                            | 2.6 ( 1.7 ) / 696        |                          | -1.15 ( -1.79 ; -0.50 )     |
| THA                                                                                                           | 4.0 ( 2.0 ) / 383        |                          | 0.00 ( Reference )          |
| <i>Heterogeneity: I<sup>2</sup> = 98 %, t<sup>2</sup> = 0.8 , X<sup>2</sup> ( 7 ) = 185.09 , p &lt; 0.001</i> |                          |                          |                             |
| <i>Consistency: X<sup>2</sup> ( 1 ) = 152.28 , p &lt; 0.001</i>                                               |                          |                          |                             |

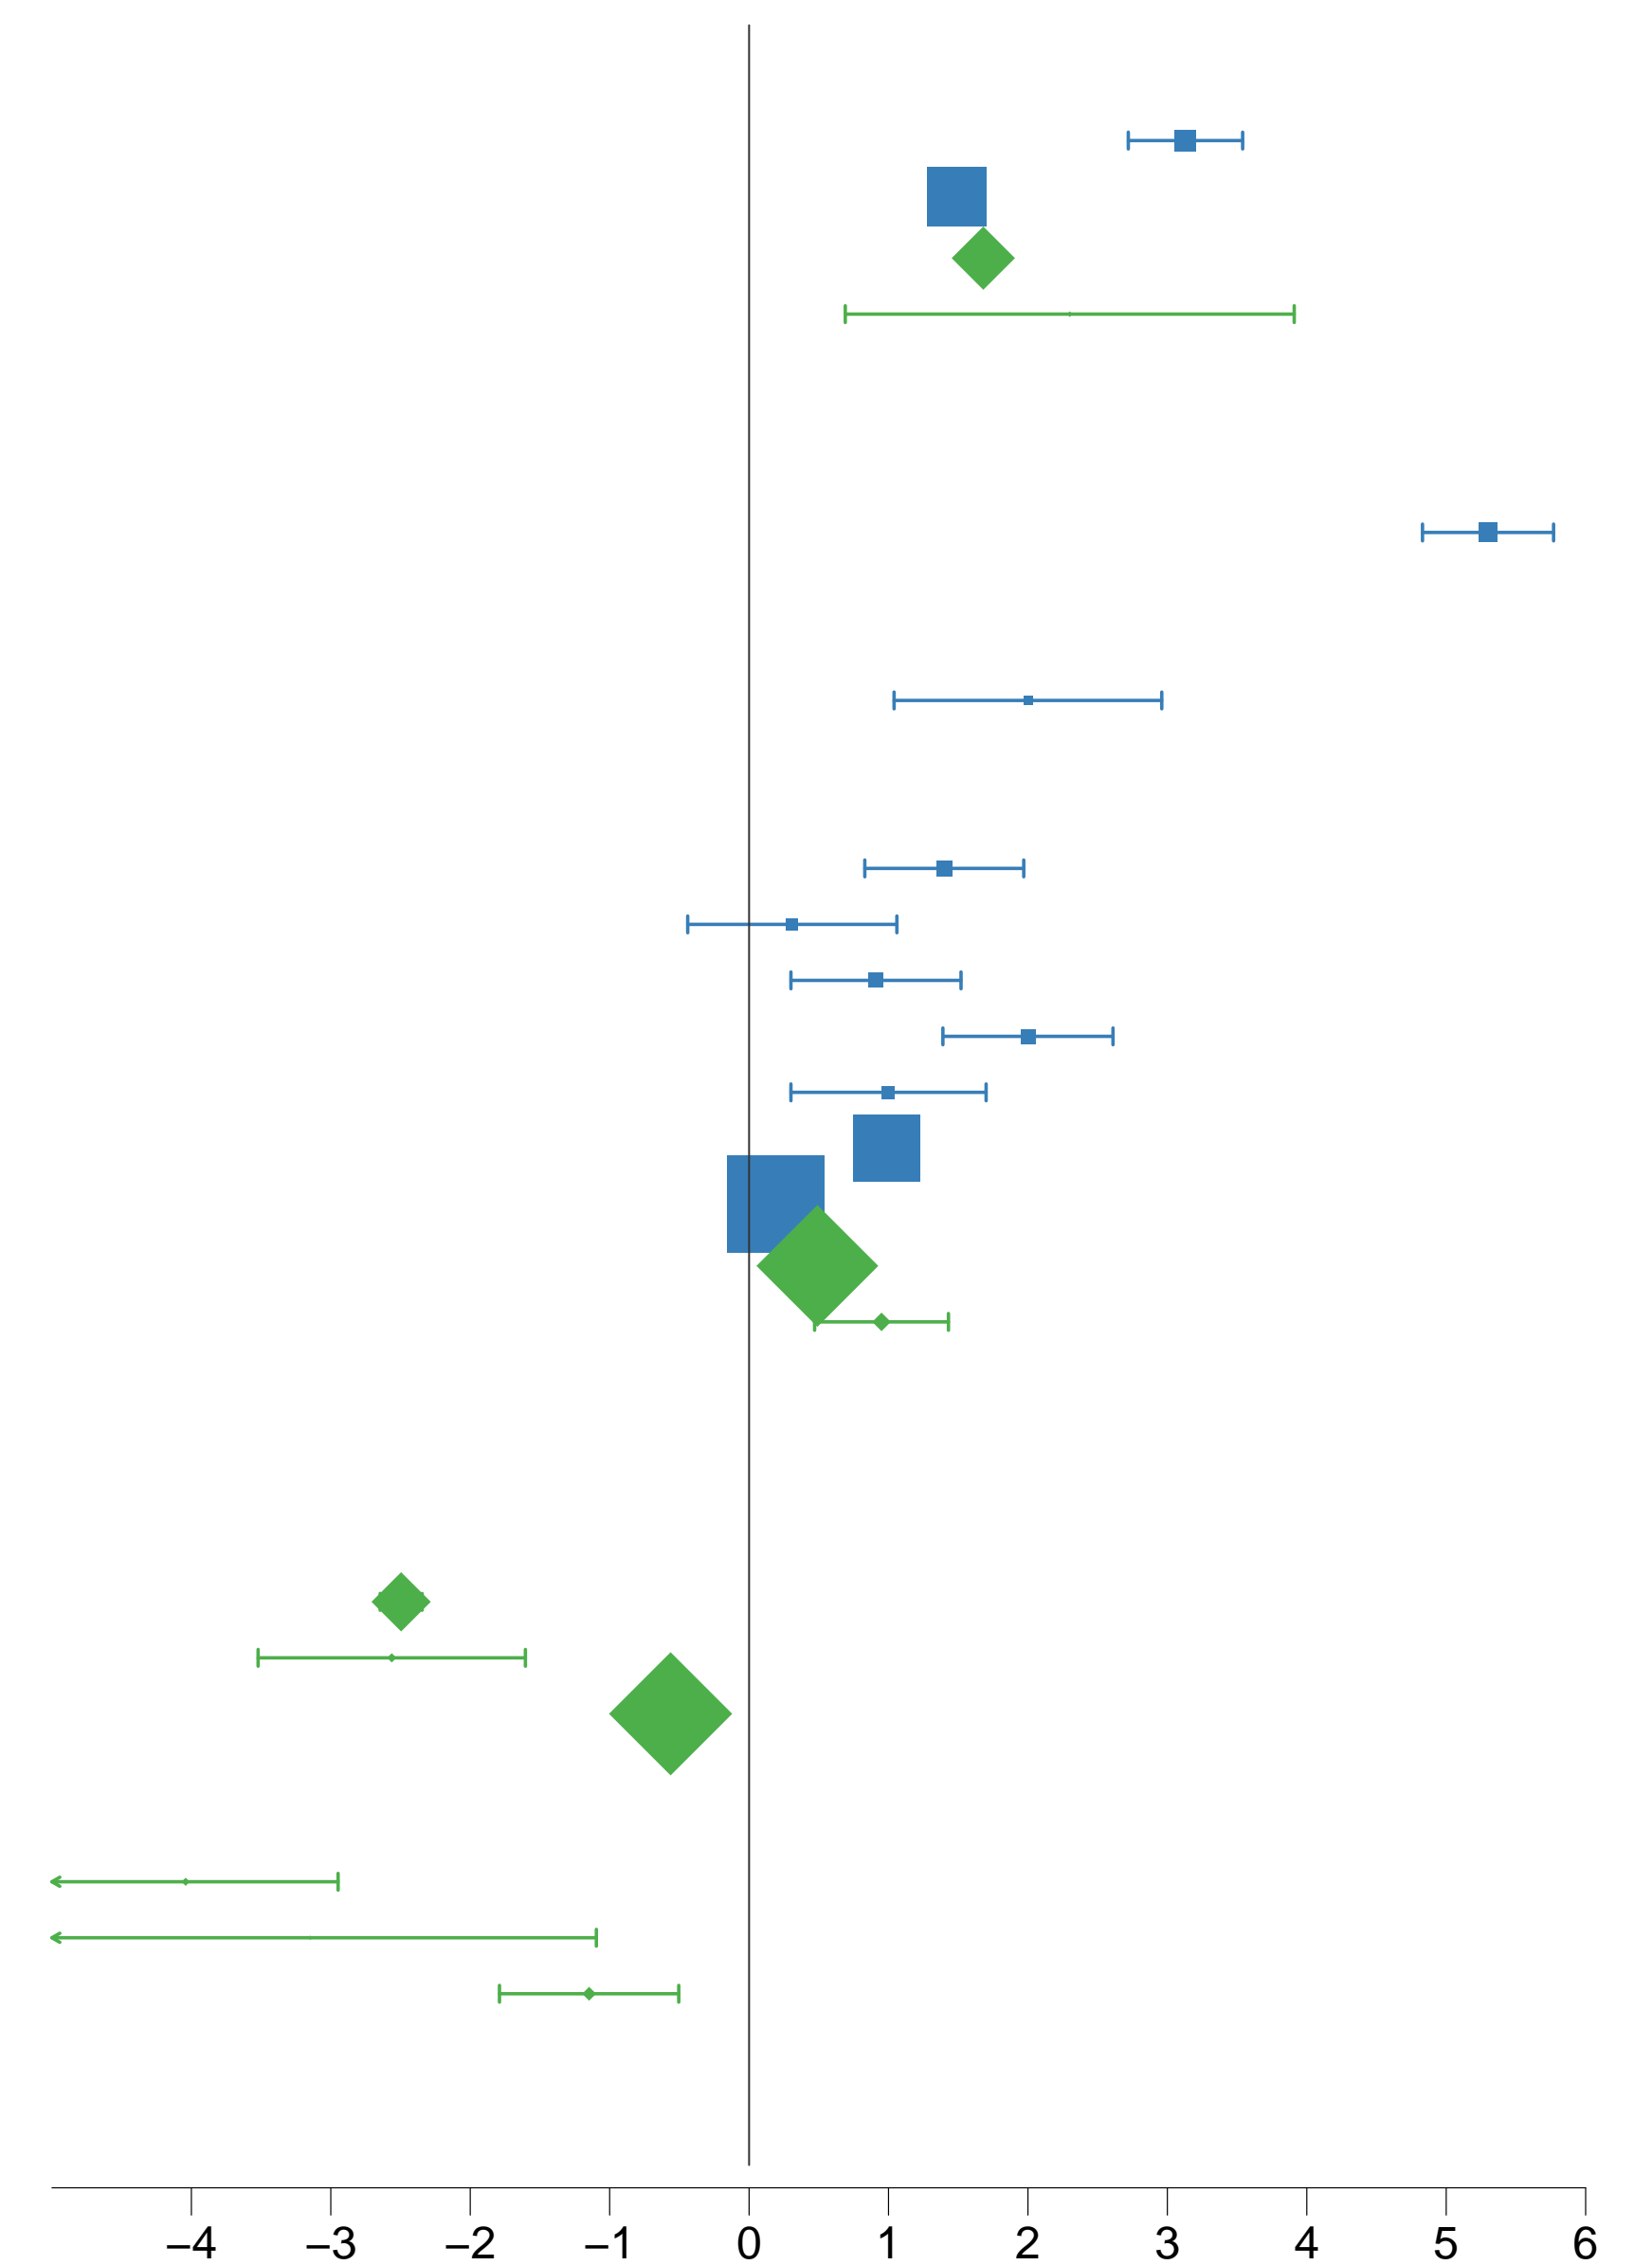

Supplement: MOESM4 [file 25967174]
