# Supplementary material for: Cannulated screws versus dynamic hip screw versus hemiarthroplasty versus total hip arthroplasty in patients with displaced and non-displaced femoral neck fractures: a systematic review and frequentist network meta-analysis of 5703 patients
Source: Springer Nature journal article supplement (doi:10.1186/s13018-023-04114-8), 2023-08-26

|                                                                                                         | Mean (SD) / Patients   | Mean (SD) / Patients   | MD (95% CI)                  |
|---------------------------------------------------------------------------------------------------------|------------------------|------------------------|------------------------------|
| HA vs CS<br>Frihagen et al. 2007                                                                        | 0.6 (0.3) / 110        | 0.5 (0.3) / 112        | 0.08 ( 0.00 ; 0.16 )         |
| THA vs HA<br>Chammout et al. 2019                                                                       | 0.7 (0.3) / 60         | 0.7 (0.2) / 60         | -0.02 ( -0.11 ; 0.07 )       |
| Hedbeck et al. 2011                                                                                     | 0.7 (0.3) / 60         | 0.6 (0.3) / 60         | 0.05 ( -0.06 ; 0.16 )        |
| <b>Fixed effects model</b>                                                                              | <b>0.7 (0.3) / 120</b> | <b>0.6 (0.3) / 120</b> | <b>0.01 ( -0.06 ; 0.08 )</b> |
| <b>Random effects model</b>                                                                             | <b>0.7 (0.3) / 120</b> | <b>0.6 (0.3) / 120</b> | <b>0.01 ( -0.06 ; 0.08 )</b> |
| <i>Heterogeneity: I<sup>2</sup> = 0 %, I<sup>2</sup> = 0.0 , X<sup>2</sup> ( 1 ) = 0.97 , p = 0.325</i> |                        |                        |                              |
| <b>NETWORK META-ANALYSIS</b>                                                                            |                        |                        |                              |
| <b>Fixed effects model</b>                                                                              |                        |                        |                              |
| CS                                                                                                      | 0.5 (0.3) / 112        |                        | -0.09 ( -0.19 ; 0.01 )       |
| HA                                                                                                      | 0.6 (0.3) / 230        |                        | -0.01 ( -0.08 ; 0.06 )       |
| THA                                                                                                     | 0.7 (0.3) / 120        |                        | 0.00 ( Reference )           |
| <b>Random effects model</b>                                                                             |                        |                        |                              |
| CS                                                                                                      | 0.5 (0.3) / 112        |                        | -0.09 ( -0.19 ; 0.01 )       |
| HA                                                                                                      | 0.6 (0.3) / 230        |                        | -0.01 ( -0.08 ; 0.06 )       |
| THA                                                                                                     | 0.7 (0.3) / 120        |                        | 0.00 ( Reference )           |
| <i>Heterogeneity: I<sup>2</sup> = 0 %, I<sup>2</sup> = 0.0 , X<sup>2</sup> ( 1 ) = 0.97 , p = 0.325</i> |                        |                        |                              |
| <i>Consistency: X<sup>2</sup> ( 0 ) = 0.00 , p = NA</i>                                                 |                        |                        |                              |

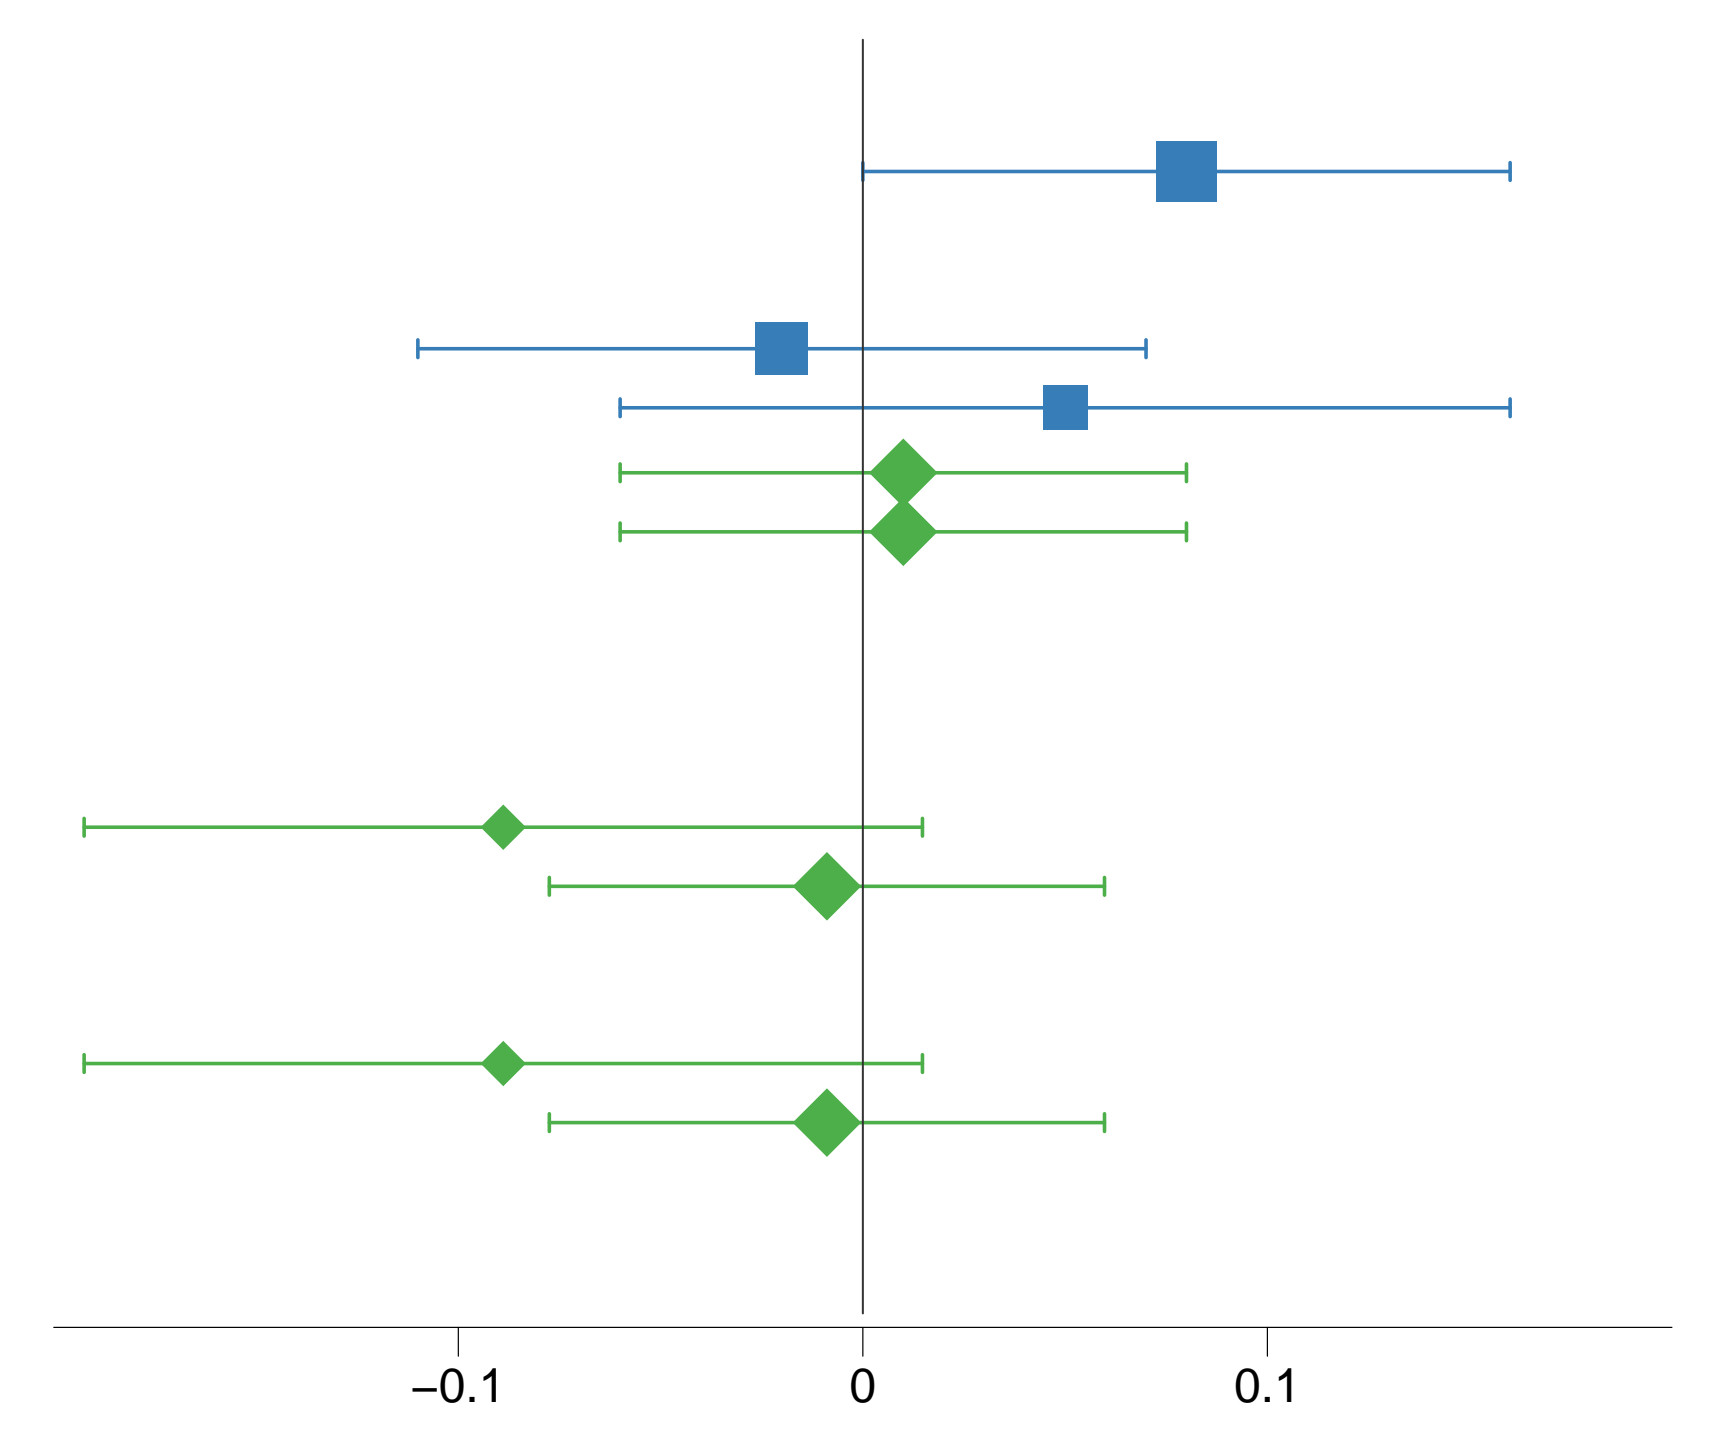

Supplement: MOESM5 [file 25967174]
