# Supplementary material for: Cannulated screws versus dynamic hip screw versus hemiarthroplasty versus total hip arthroplasty in patients with displaced and non-displaced femoral neck fractures: a systematic review and frequentist network meta-analysis of 5703 patients
Source: Springer Nature journal article supplement (doi:10.1186/s13018-023-04114-8), 2023-08-26

|                                                                                                         | Mean (SD) / Patients       | Mean (SD) / Patients       | MD (95% CI)                  |
|---------------------------------------------------------------------------------------------------------|----------------------------|----------------------------|------------------------------|
| <b>HA vs CS</b>                                                                                         |                            |                            |                              |
| Frihagen et al. 2007                                                                                    | 67.7 ( 15.8 ) / 110        | 59.6 ( 19.5 ) / 112        | 8.10 ( 3.44 ; 12.76 )        |
| Steon et al. 2014                                                                                       | 67.0 ( 15.8 ) / 110        | 59.0 ( 19.5 ) / 112        | 8.00 ( 3.34 ; 12.66 )        |
| <b>Fixed effects model</b>                                                                              | <b>67.3 ( 15.8 ) / 220</b> | <b>59.3 ( 19.5 ) / 224</b> | <b>8.05 ( 4.75 ; 11.35 )</b> |
| <b>Random effects model</b>                                                                             | <b>67.3 ( 15.8 ) / 220</b> | <b>59.3 ( 19.5 ) / 224</b> | <b>8.05 ( 4.75 ; 11.35 )</b> |
| <i>Heterogeneity: I<sup>2</sup> = 0 %, t<sup>2</sup> = 0.0 , X<sup>2</sup> ( 1 ) = 0.00 , p = 0.976</i> |                            |                            |                              |
| <b>HA vs DHS</b>                                                                                        |                            |                            |                              |
| Mouzopoulos et al. 2008                                                                                 | 58.3 ( 6.2 ) / 34          | 58.1 ( 5.3 ) / 38          | 0.20 ( -3.07 ; 3.47 )        |
| <b>THA vs DHS</b>                                                                                       |                            |                            |                              |
| Mouzopoulos et al. 2008                                                                                 | 59.4 ( 5.8 ) / 37          | 58.1 ( 5.3 ) / 38          | 1.30 ( -1.64 ; 4.24 )        |
| <b>THA vs HA</b>                                                                                        |                            |                            |                              |
| Cadossi et al. 2013                                                                                     | 74.0 ( 14.6 ) / 60         | 72.3 ( 16.2 ) / 60         | 1.70 ( -3.81 ; 7.21 )        |
| Chammout et al. 2019                                                                                    | 70.0 ( 13.0 ) / 60         | 69.0 ( 14.0 ) / 60         | 1.00 ( -3.83 ; 5.83 )        |
| Mouzopoulos et al. 2008                                                                                 | 59.4 ( 5.8 ) / 37          | 58.3 ( 6.2 ) / 34          | 1.10 ( -2.53 ; 4.73 )        |
| Ukaj et al. 2019                                                                                        | 88.0 ( 5.7 ) / 47          | 86.8 ( 6.5 ) / 49          | 1.14 ( -1.29 ; 3.57 )        |
| Blomfeldt et al. 2007                                                                                   | 82.5 ( 11.5 ) / 60         | 77.5 ( 15.7 ) / 60         | 5.00 ( 0.08 ; 9.92 )         |
| Hedbeck et al. 2011                                                                                     | 82.5 ( 11.5 ) / 60         | 77.5 ( 12.4 ) / 60         | 5.00 ( 0.72 ; 9.28 )         |
| Macaulay et al. 2007                                                                                    | 76.1 ( 26.5 ) / 17         | 77.1 ( 12.0 ) / 23         | -1.00 ( -14.52 ; 12.52 )     |
| Ukaj et al. 2019                                                                                        | 90.9 ( 6.9 ) / 47          | 87.3 ( 8.7 ) / 49          | 3.60 ( 0.47 ; 6.73 )         |
| <b>Fixed effects model</b>                                                                              | <b>78.4 ( 15.0 ) / 388</b> | <b>76.1 ( 14.9 ) / 395</b> | <b>2.32 ( 0.94 ; 3.70 )</b>  |
| <b>Random effects model</b>                                                                             | <b>78.4 ( 15.0 ) / 388</b> | <b>76.1 ( 14.9 ) / 395</b> | <b>2.32 ( 0.94 ; 3.70 )</b>  |
| <i>Heterogeneity: I<sup>2</sup> = 0 %, t<sup>2</sup> = 0.0 , X<sup>2</sup> ( 7 ) = 5.46 , p = 0.603</i> |                            |                            |                              |
| <b>NETWORK META-ANALYSIS</b>                                                                            |                            |                            |                              |
| <b>Fixed effects model</b>                                                                              |                            |                            |                              |
| CS                                                                                                      | 59.3 ( 19.5 ) / 224        |                            | -10.26 ( -13.81 ; -6.71 )    |
| DHS                                                                                                     | 58.1 ( 5.3 ) / 76          |                            | -1.80 ( -4.06 ; 0.47 )       |
| HA                                                                                                      | 73.0 ( 15.8 ) / 649        |                            | -2.21 ( -3.53 ; -0.89 )      |
| THA                                                                                                     | 78.4 ( 15.0 ) / 425        |                            | 0.00 ( Reference )           |
| <b>Random effects model</b>                                                                             |                            |                            |                              |
| CS                                                                                                      | 59.3 ( 19.5 ) / 224        |                            | -10.26 ( -13.81 ; -6.71 )    |
| DHS                                                                                                     | 58.1 ( 5.3 ) / 76          |                            | -1.80 ( -4.06 ; 0.47 )       |
| HA                                                                                                      | 73.0 ( 15.8 ) / 649        |                            | -2.21 ( -3.53 ; -0.89 )      |
| THA                                                                                                     | 78.4 ( 15.0 ) / 425        |                            | 0.00 ( Reference )           |
| <i>Heterogeneity: I<sup>2</sup> = 0 %, t<sup>2</sup> = 0.0 , X<sup>2</sup> ( 7 ) = 4.69 , p = 0.698</i> |                            |                            |                              |
| <i>Consistency: X<sup>2</sup> ( 1 ) = 0.78 , p = 0.378</i>                                              |                            |                            |                              |

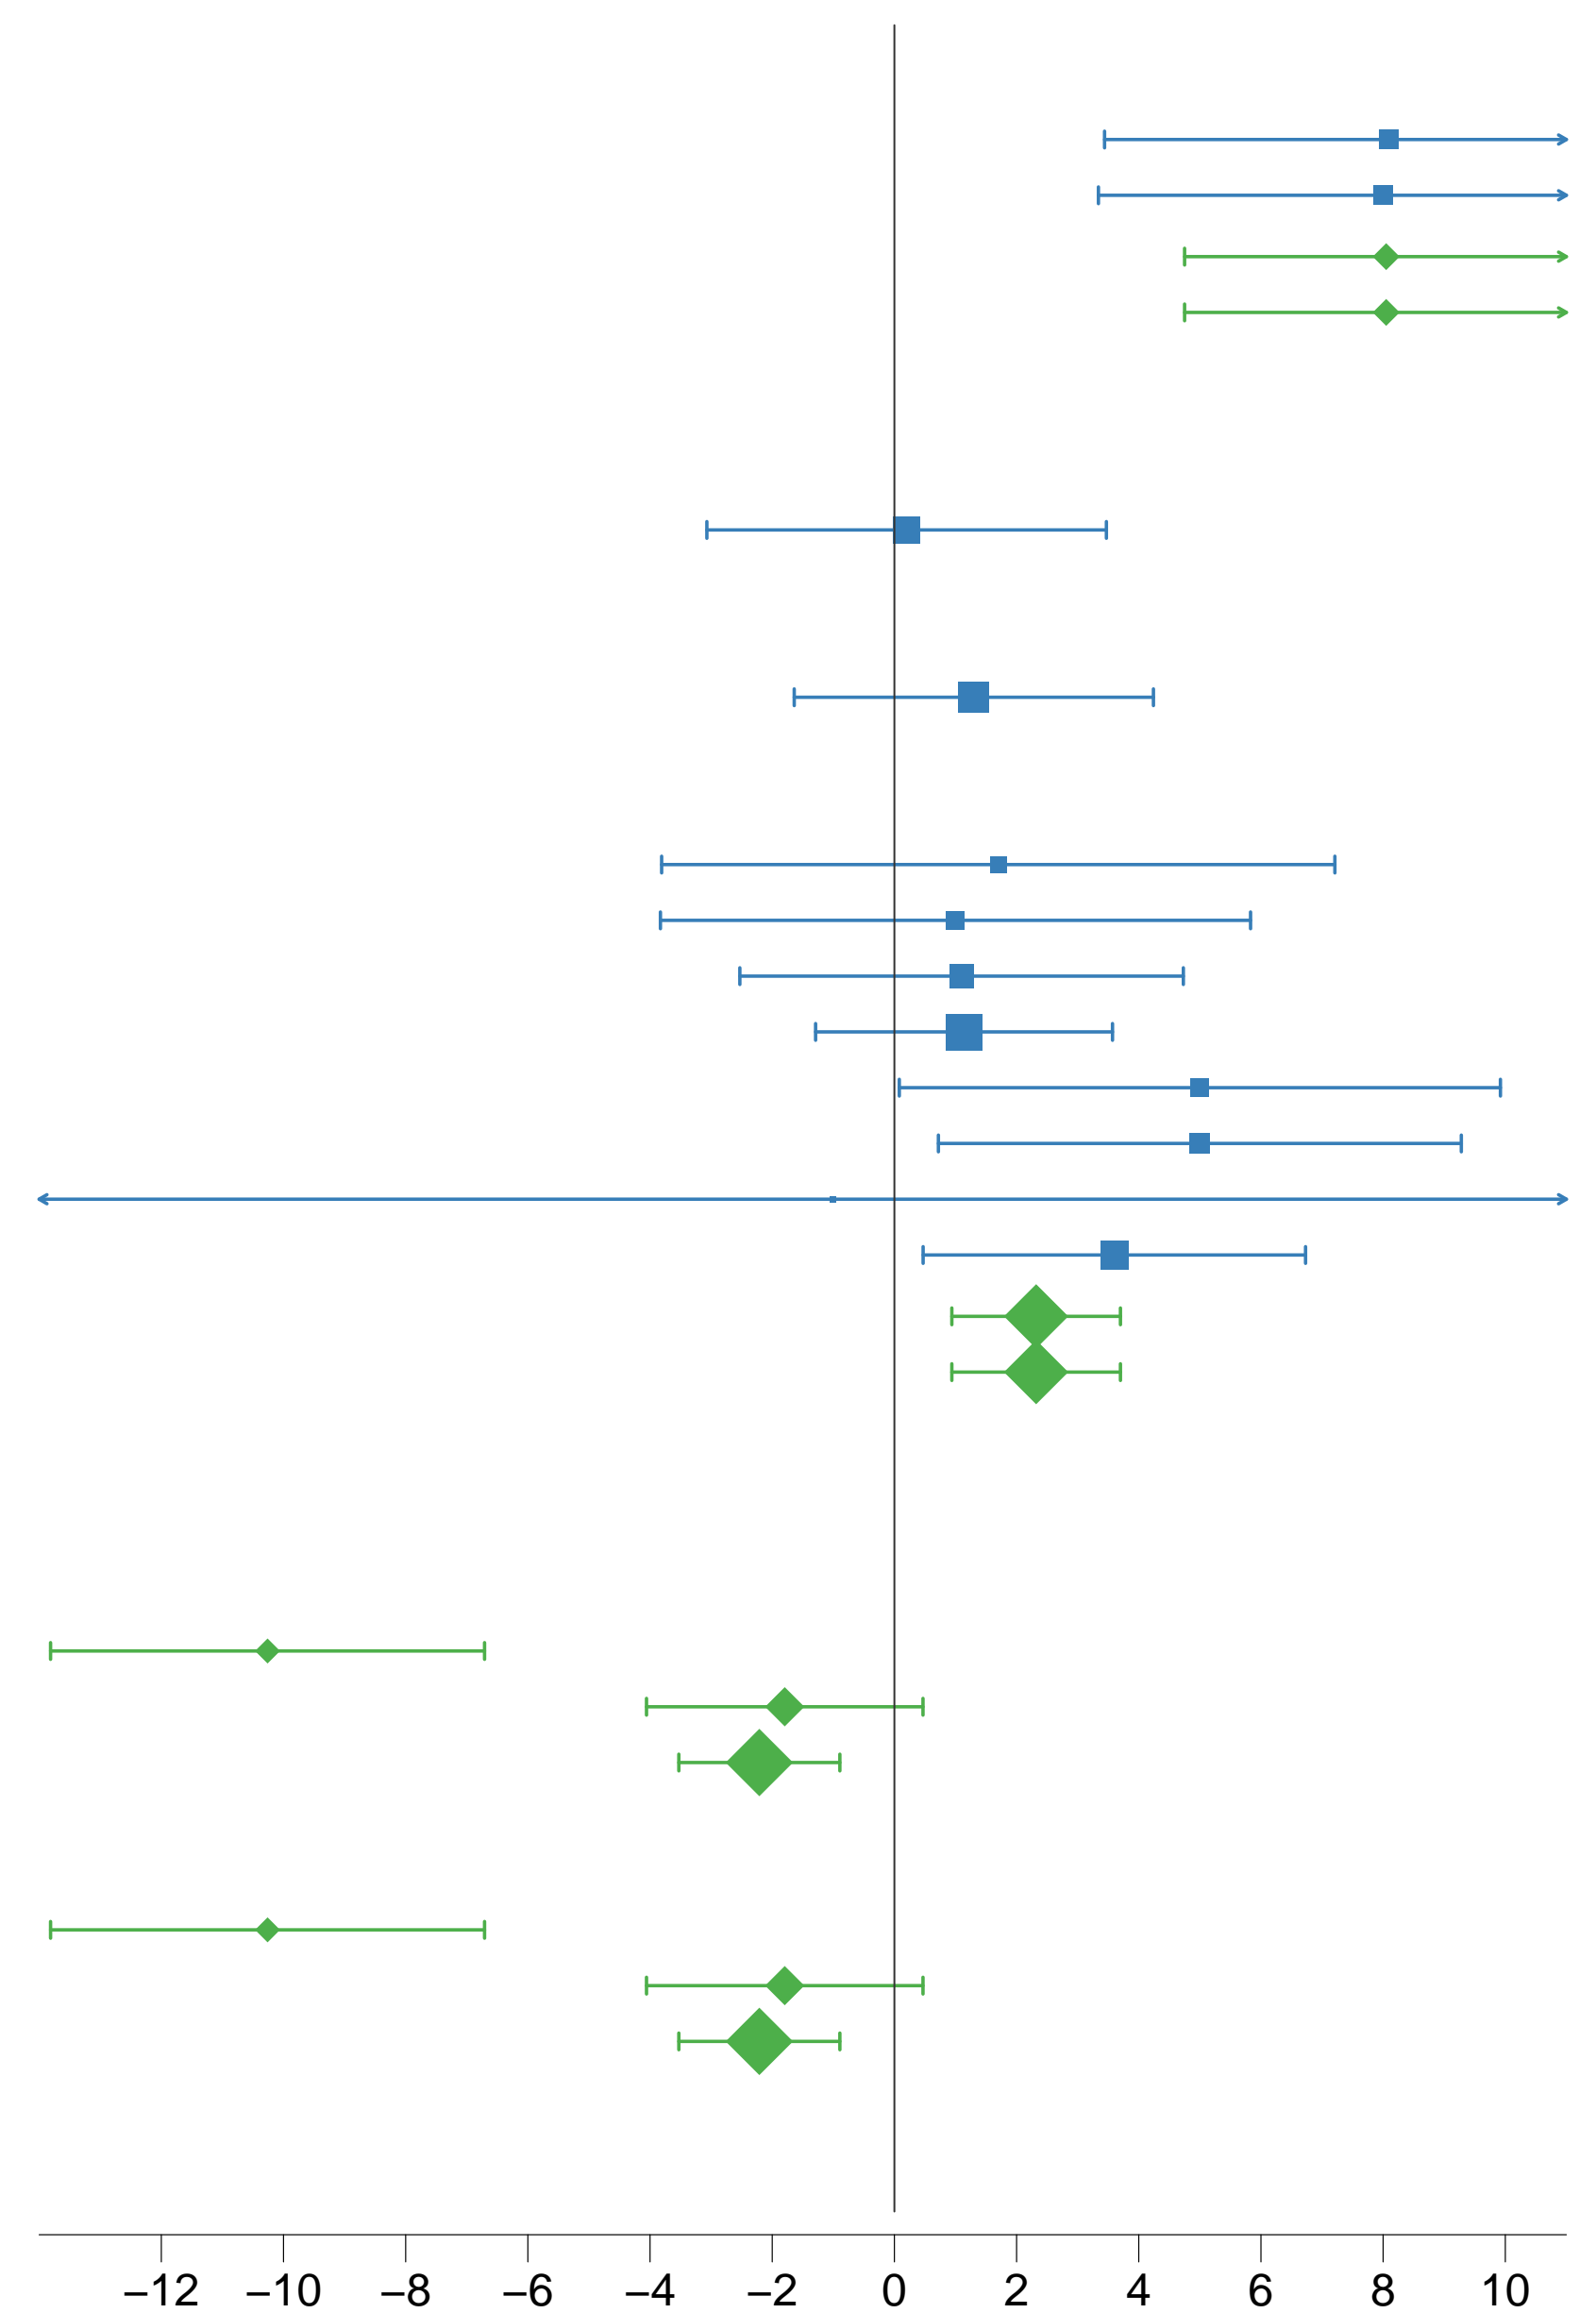

Supplement: MOESM8 [file 25967174]
