# Supplementary material for: Cannulated screws versus dynamic hip screw versus hemiarthroplasty versus total hip arthroplasty in patients with displaced and non-displaced femoral neck fractures: a systematic review and frequentist network meta-analysis of 5703 patients
Source: Springer Nature journal article supplement (doi:10.1186/s13018-023-04114-8), 2023-08-26

|                                                                                                           | Mean (SD) / Patients       | Mean (SD) / Patients       | MD (95% CI)                  |
|-----------------------------------------------------------------------------------------------------------|----------------------------|----------------------------|------------------------------|
| <b>HA vs CS</b>                                                                                           |                            |                            |                              |
| Frihagen et al. 2007                                                                                      | 72.6 ( 17.5 ) / 110        | 65.8 ( 15.9 ) / 112        | 6.80 ( 2.40 ; 11.20 )        |
| Steon et al. 2014                                                                                         | 72.0 ( 17.5 ) / 110        | 65.0 ( 15.9 ) / 112        | 7.00 ( 2.60 ; 11.40 )        |
| <b>Fixed effects model</b>                                                                                | <b>72.3 ( 17.5 ) / 220</b> | <b>65.4 ( 15.9 ) / 224</b> | <b>6.90 ( 3.79 ; 10.01 )</b> |
| <b>Random effects model</b>                                                                               | <b>72.3 ( 17.5 ) / 220</b> | <b>65.4 ( 15.9 ) / 224</b> | <b>6.90 ( 3.79 ; 10.01 )</b> |
| <i>Heterogeneity: I<sup>2</sup> = 0 %, t<sup>2</sup> = 0.0 , X<sup>2</sup> ( 1 ) = 0.00 , p = 0.950</i>   |                            |                            |                              |
| <b>HA vs DHS</b>                                                                                          |                            |                            |                              |
| Davison et al. 2001                                                                                       | 72.2 ( 16.5 ) / 187        | 70.8 ( 5.3 ) / 93          | 1.40 ( -1.20 ; 4.00 )        |
| Mouzopoulos et al. 2008                                                                                   | 77.8 ( 9.6 ) / 34          | 71.3 ( 5.3 ) / 38          | 6.51 ( 1.50 ; 11.52 )        |
| <b>Fixed effects model</b>                                                                                | <b>73.1 ( 15.7 ) / 221</b> | <b>70.9 ( 5.3 ) / 131</b>  | <b>2.48 ( 0.18 ; 4.79 )</b>  |
| <b>Random effects model</b>                                                                               | <b>73.1 ( 15.7 ) / 221</b> | <b>70.9 ( 5.3 ) / 131</b>  | <b>3.49 ( -1.44 ; 8.41 )</b> |
| <i>Heterogeneity: I<sup>2</sup> = 80 %, t<sup>2</sup> = 10.5 , X<sup>2</sup> ( 1 ) = 5.02 , p = 0.025</i> |                            |                            |                              |
| <b>THA vs DHS</b>                                                                                         |                            |                            |                              |
| Mouzopoulos et al. 2008                                                                                   | 81.6 ( 4.9 ) / 37          | 71.3 ( 5.3 ) / 38          | 10.30 ( 7.85 ; 12.75 )       |
| <b>THA vs HA</b>                                                                                          |                            |                            |                              |
| Blomfeldt et al. 2007                                                                                     | 87.2 ( 9.1 ) / 60          | 79.4 ( 16.5 ) / 60         | 7.80 ( 3.04 ; 12.56 )        |
| Cadossi et al. 2013                                                                                       | 73.1 ( 9.1 ) / 47          | 74.7 ( 16.5 ) / 49         | -1.60 ( -6.90 ; 3.70 )       |
| Chammout et al. 2019                                                                                      | 74.0 ( 9.1 ) / 60          | 71.0 ( 16.5 ) / 60         | 3.00 ( -1.76 ; 7.76 )        |
| Hedbeck et al. 2011                                                                                       | 87.2 ( 9.4 ) / 60          | 79.4 ( 12.3 ) / 60         | 7.80 ( 3.88 ; 11.72 )        |
| Macaulay et al. 2007                                                                                      | 84.2 ( 12.0 ) / 17         | 80.6 ( 14.3 ) / 23         | 3.60 ( -4.57 ; 11.77 )       |
| Mouzopoulos et al. 2008                                                                                   | 81.6 ( 4.9 ) / 37          | 77.8 ( 9.6 ) / 34          | 3.79 ( -0.91 ; 8.49 )        |
| Sharma et al. 2016                                                                                        | 90.0 ( 9.1 ) / 40          | 80.0 ( 16.5 ) / 40         | 10.00 ( 4.16 ; 15.84 )       |
| Ukaj et al. 2019                                                                                          | 92.3 ( 7.2 ) / 47          | 88.4 ( 8.3 ) / 49          | 3.85 ( 0.75 ; 6.95 )         |
| van den Bekerom et al. 2010                                                                               | 76.0 ( 9.1 ) / 115         | 73.9 ( 16.5 ) / 137        | 2.10 ( -1.12 ; 5.32 )        |
| <b>Fixed effects model</b>                                                                                | <b>81.7 ( 11.1 ) / 483</b> | <b>77.4 ( 15.6 ) / 512</b> | <b>4.28 ( 2.83 ; 5.72 )</b>  |
| <b>Random effects model</b>                                                                               | <b>81.7 ( 11.1 ) / 483</b> | <b>77.4 ( 15.6 ) / 512</b> | <b>4.42 ( 2.29 ; 6.54 )</b>  |
| <i>Heterogeneity: I<sup>2</sup> = 49 %, t<sup>2</sup> = 4.6 , X<sup>2</sup> ( 8 ) = 15.82 , p = 0.045</i> |                            |                            |                              |
| <b>NETWORK META-ANALYSIS</b>                                                                              |                            |                            |                              |
| <b>Fixed effects model</b>                                                                                |                            |                            |                              |
| CS                                                                                                        | 65.4 ( 15.9 ) / 224        |                            | -11.73 ( -15.11 ; -8.35 )    |
| DHS                                                                                                       | 70.9 ( 5.3 ) / 169         |                            | -8.71 ( -10.53 ; -6.89 )     |
| HA                                                                                                        | 75.1 ( 16.4 ) / 953        |                            | -4.83 ( -6.16 ; -3.50 )      |
| THA                                                                                                       | 81.7 ( 11.1 ) / 520        |                            | 0.00 ( Reference )           |
| <b>Random effects model</b>                                                                               |                            |                            |                              |
| CS                                                                                                        | 65.4 ( 15.9 ) / 224        |                            | -11.57 ( -16.45 ; -6.69 )    |
| DHS                                                                                                       | 70.9 ( 5.3 ) / 169         |                            | -8.65 ( -12.30 ; -5.00 )     |
| HA                                                                                                        | 75.1 ( 16.4 ) / 953        |                            | -4.67 ( -6.74 ; -2.60 )      |
| THA                                                                                                       | 81.7 ( 11.1 ) / 520        |                            | 0.00 ( Reference )           |
| <i>Heterogeneity: I<sup>2</sup> = 56 %, t<sup>2</sup> = 5.1 , X<sup>2</sup> ( 8 ) = 15.75 , p = 0.046</i> |                            |                            |                              |
| <i>Consistency: X<sup>2</sup> ( 2 ) = 6.78 , p = 0.034</i>                                                |                            |                            |                              |

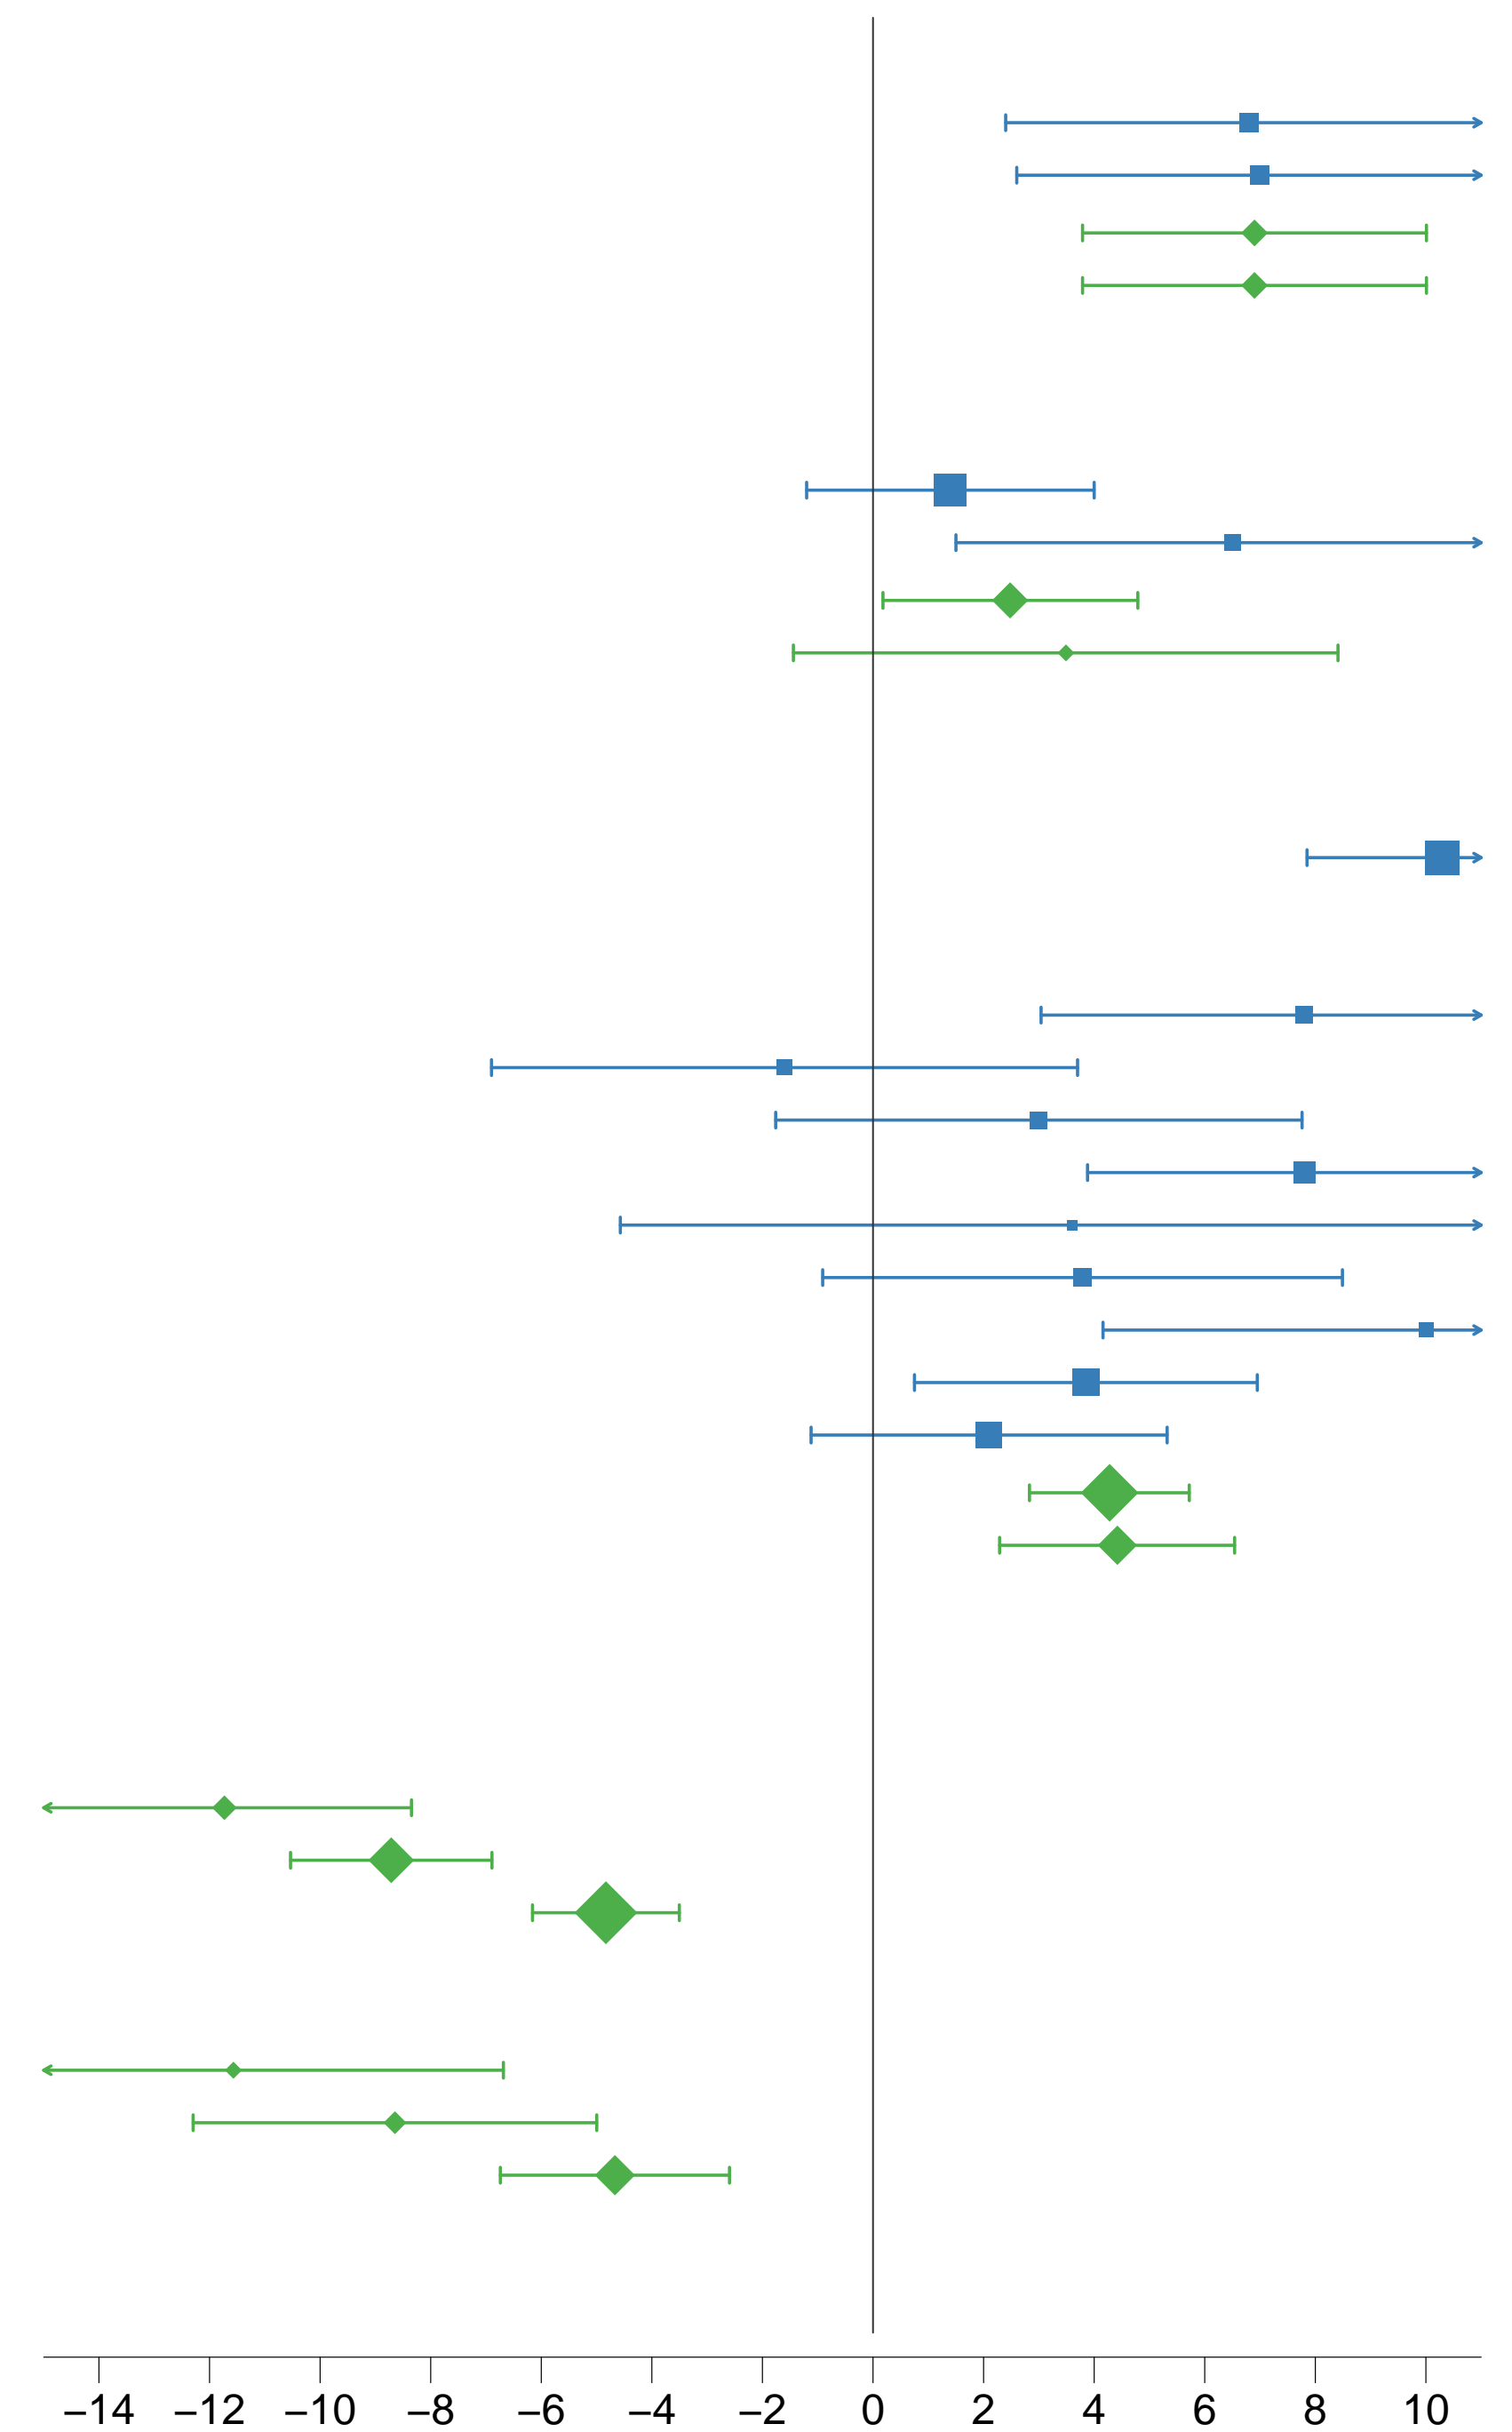

Supplement: MOESM9 [file 25967174]
