# Supplementary material for: Cannulated screws versus dynamic hip screw versus hemiarthroplasty versus total hip arthroplasty in patients with displaced and non-displaced femoral neck fractures: a systematic review and frequentist network meta-analysis of 5703 patients
Source: Springer Nature journal article supplement (doi:10.1186/s13018-023-04114-8), 2023-08-26

|                                                                                                            | Mean (SD) / Patients       | Mean (SD) / Patients       | MD (95% CI)                  |
|------------------------------------------------------------------------------------------------------------|----------------------------|----------------------------|------------------------------|
| <b>HA vs CS</b>                                                                                            |                            |                            |                              |
| Frihagen et al. 2007                                                                                       | 70.6 ( 19.1 ) / 110        | 67.3 ( 15.5 ) / 112        | 3.30 ( -1.28 ; 7.88 )        |
| Steon et al. 2014                                                                                          | 70.0 ( 19.1 ) / 110        | 67.0 ( 15.5 ) / 112        | 3.00 ( -1.58 ; 7.58 )        |
| <b>Fixed effects model</b>                                                                                 | <b>70.3 ( 19.1 ) / 220</b> | <b>67.1 ( 15.5 ) / 224</b> | <b>3.15 ( -0.09 ; 6.39 )</b> |
| <b>Random effects model</b>                                                                                | <b>70.3 ( 19.1 ) / 220</b> | <b>67.1 ( 15.5 ) / 224</b> | <b>3.15 ( -0.09 ; 6.39 )</b> |
| <i>Heterogeneity: I<sup>2</sup> = 0 %, t<sup>2</sup> = 0.0 , X<sup>2</sup> ( 1 ) = 0.01 , p = 0.928</i>    |                            |                            |                              |
| <b>HA vs DHS</b>                                                                                           |                            |                            |                              |
| Davison et al. 2001                                                                                        | 74.3 ( 16.8 ) / 187        | 70.7 ( 16.6 ) / 93         | 3.60 ( -0.54 ; 7.74 )        |
| <b>THA vs HA</b>                                                                                           |                            |                            |                              |
| Cadossi et al. 2013                                                                                        | 71.9 ( 13.1 ) / 47         | 75.0 ( 16.8 ) / 49         | -3.10 ( -9.11 ; 2.91 )       |
| Chammout et al. 2019                                                                                       | 76.0 ( 15.0 ) / 60         | 74.0 ( 14.0 ) / 60         | 2.00 ( -3.19 ; 7.19 )        |
| Hedbeck et al. 2011                                                                                        | 87.2 ( 10.1 ) / 60         | 77.9 ( 12.5 ) / 60         | 9.30 ( 5.23 ; 13.37 )        |
| Macaulay et al. 2008                                                                                       | 84.0 ( 12.2 ) / 17         | 81.1 ( 11.7 ) / 23         | 2.90 ( -4.62 ; 10.42 )       |
| Sonaje et al. 2018                                                                                         | 88.0 ( 5.8 ) / 21          | 83.9 ( 6.6 ) / 21          | 4.10 ( 0.34 ; 7.86 )         |
| <b>Fixed effects model</b>                                                                                 | <b>80.2 ( 13.8 ) / 205</b> | <b>77.1 ( 13.8 ) / 213</b> | <b>4.17 ( 2.01 ; 6.34 )</b>  |
| <b>Random effects model</b>                                                                                | <b>80.2 ( 13.8 ) / 205</b> | <b>77.1 ( 13.8 ) / 213</b> | <b>3.41 ( -0.60 ; 7.41 )</b> |
| <i>Heterogeneity: I<sup>2</sup> = 68 %, t<sup>2</sup> = 13.7 , X<sup>2</sup> ( 4 ) = 12.52 , p = 0.014</i> |                            |                            |                              |
| <b>NETWORK META-ANALYSIS</b>                                                                               |                            |                            |                              |
| <b>Fixed effects model</b>                                                                                 |                            |                            |                              |
| CS                                                                                                         | 67.1 ( 15.5 ) / 224        |                            | -7.32 ( -11.22 ; -3.43 )     |
| DHS                                                                                                        | 70.7 ( 16.6 ) / 93         |                            | -7.77 ( -12.45 ; -3.10 )     |
| HA                                                                                                         | 73.8 ( 16.9 ) / 620        |                            | -4.17 ( -6.34 ; -2.01 )      |
| THA                                                                                                        | 80.2 ( 13.8 ) / 205        |                            | 0.00 ( Reference )           |
| <b>Random effects model</b>                                                                                |                            |                            |                              |
| CS                                                                                                         | 67.1 ( 15.5 ) / 224        |                            | -6.66 ( -13.06 ; -0.25 )     |
| DHS                                                                                                        | 70.7 ( 16.6 ) / 93         |                            | -7.11 ( -15.21 ; 1.00 )      |
| HA                                                                                                         | 73.8 ( 16.9 ) / 620        |                            | -3.51 ( -7.05 ; 0.04 )       |
| THA                                                                                                        | 80.2 ( 13.8 ) / 205        |                            | 0.00 ( Reference )           |
| <i>Heterogeneity: I<sup>2</sup> = 60 %, t<sup>2</sup> = 9.4 , X<sup>2</sup> ( 5 ) = 12.53 , p = 0.028</i>  |                            |                            |                              |
| <i>Consistency: X<sup>2</sup> ( 0 ) = 0.00 , p = NA</i>                                                    |                            |                            |                              |

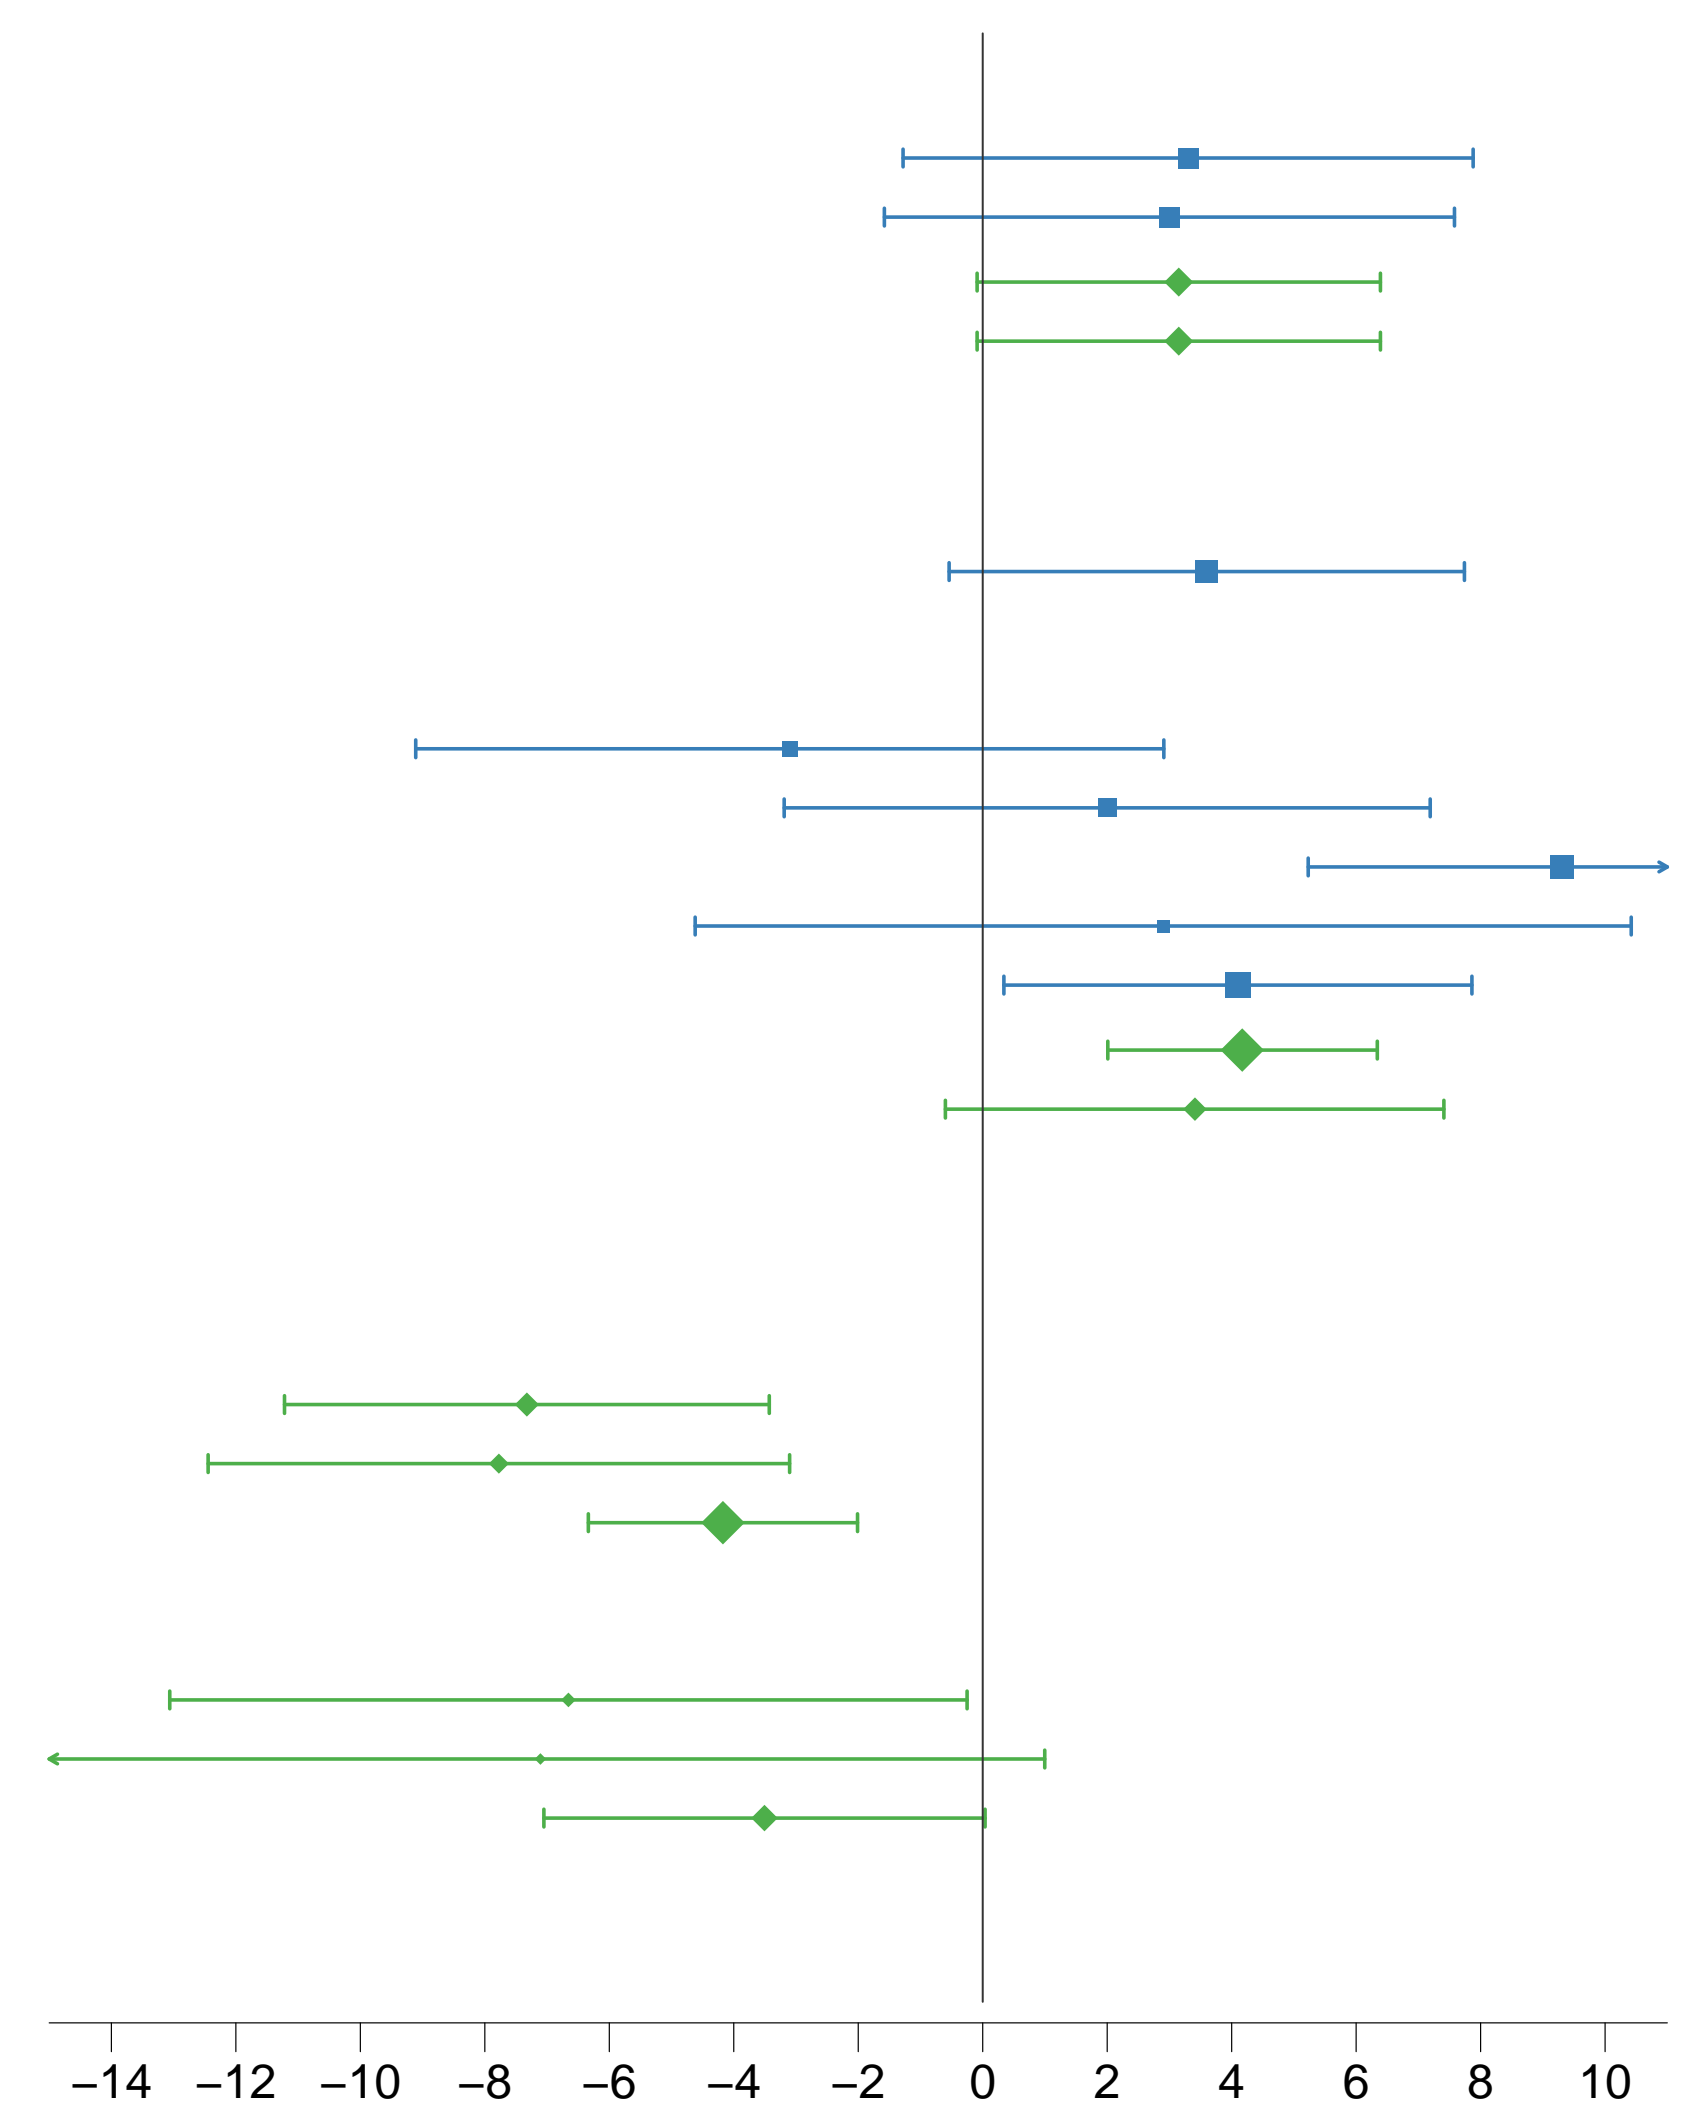

Supplement: MOESM10 [file 25967174]
