# Supplementary material for: Cannulated screws versus dynamic hip screw versus hemiarthroplasty versus total hip arthroplasty in patients with displaced and non-displaced femoral neck fractures: a systematic review and frequentist network meta-analysis of 5703 patients
Source: Springer Nature journal article supplement (doi:10.1186/s13018-023-04114-8), 2023-08-26

|                                                                                                               | Mean (SD) / Patients       | Mean (SD) / Patients       | MD (95% CI)                  |
|---------------------------------------------------------------------------------------------------------------|----------------------------|----------------------------|------------------------------|
| <b>HA vs DHS</b>                                                                                              |                            |                            |                              |
| Davison et al. 2001                                                                                           | 73.6 ( 10.1 ) / 187        | 70.6 ( 9.9 ) / 93          | 3.00 ( 0.53 ; 5.47 )         |
| Davison et al. 2001                                                                                           | 73.1 ( 12.7 ) / 187        | 71.8 ( 6.7 ) / 93          | 1.30 ( -0.98 ; 3.58 )        |
| Mouzopoulos et al. 2008                                                                                       | 79.5 ( 6.5 ) / 34          | 73.6 ( 6.7 ) / 38          | 5.90 ( 2.13 ; 9.67 )         |
| Davison et al. 2001                                                                                           | 72.7 ( 5.4 ) / 187         | 70.0 ( 5.9 ) / 93          | 2.70 ( 1.27 ; 4.13 )         |
| <b>Fixed effects model</b>                                                                                    | <b>73.5 ( 9.8 ) / 595</b>  | <b>71.1 ( 7.6 ) / 317</b>  | <b>2.70 ( 1.66 ; 3.75 )</b>  |
| <b>Random effects model</b>                                                                                   | <b>73.5 ( 9.8 ) / 595</b>  | <b>71.1 ( 7.6 ) / 317</b>  | <b>2.77 ( 1.43 ; 4.12 )</b>  |
| <i>Heterogeneity: I<sup>2</sup> = 47 %, t<sup>2</sup> = 1.1 , X<sup>2</sup> ( 3 ) = 5.67 , p = 0.129</i>      |                            |                            |                              |
| <b>THA vs DHS</b>                                                                                             |                            |                            |                              |
| Mouzopoulos et al. 2008                                                                                       | 83.7 ( 6.5 ) / 37          | 73.6 ( 6.7 ) / 38          | 10.10 ( 6.48 ; 13.72 )       |
| <b>THA vs HA</b>                                                                                              |                            |                            |                              |
| Cadossi et al. 2013                                                                                           | 71.3 ( 6.0 ) / 47          | 78.7 ( 10.1 ) / 49         | -7.40 ( -10.70 ; -4.10 )     |
| Ukaj et al. 2019                                                                                              | 92.5 ( 6.0 ) / 47          | 88.3 ( 7.7 ) / 49          | 4.20 ( 1.44 ; 6.96 )         |
| Hedbeck et al. 2011                                                                                           | 89.0 ( 8.1 ) / 60          | 75.2 ( 15.4 ) / 60         | 13.80 ( 9.40 ; 18.20 )       |
| Mouzopoulos et al. 2008                                                                                       | 83.7 ( 6.5 ) / 37          | 79.5 ( 6.5 ) / 34          | 4.20 ( 0.49 ; 7.91 )         |
| van den Bekerom et al. 2010                                                                                   | 75.2 ( 5.9 ) / 115         | 71.9 ( 5.4 ) / 137         | 3.30 ( 1.89 ; 4.71 )         |
| <b>Fixed effects model</b>                                                                                    | <b>81.0 ( 10.1 ) / 306</b> | <b>76.7 ( 10.7 ) / 329</b> | <b>3.00 ( 1.91 ; 4.08 )</b>  |
| <b>Random effects model</b>                                                                                   | <b>81.0 ( 10.1 ) / 306</b> | <b>76.7 ( 10.7 ) / 329</b> | <b>3.49 ( -1.50 ; 8.48 )</b> |
| <i>Heterogeneity: I<sup>2</sup> = 94 %, t<sup>2</sup> = 27.5 , X<sup>2</sup> ( 4 ) = 62.69 , p &lt; 0.001</i> |                            |                            |                              |
| <b>NETWORK META-ANALYSIS</b>                                                                                  |                            |                            |                              |
| <b>Fixed effects model</b>                                                                                    |                            |                            |                              |
| DHS                                                                                                           | 71.1 ( 7.6 ) / 355         |                            | -6.35 ( -7.75 ; -4.96 )      |
| HA                                                                                                            | 74.5 ( 10.3 ) / 924        |                            | -3.34 ( -4.38 ; -2.29 )      |
| THA                                                                                                           | 81.0 ( 10.1 ) / 343        |                            | 0.00 ( Reference )           |
| <b>Random effects model</b>                                                                                   |                            |                            |                              |
| DHS                                                                                                           | 71.1 ( 7.6 ) / 355         |                            | -7.19 ( -11.95 ; -2.44 )     |
| HA                                                                                                            | 74.5 ( 10.3 ) / 924        |                            | -3.75 ( -7.23 ; -0.27 )      |
| THA                                                                                                           | 81.0 ( 10.1 ) / 343        |                            | 0.00 ( Reference )           |
| <i>Heterogeneity: I<sup>2</sup> = 90 %, t<sup>2</sup> = 14.1 , X<sup>2</sup> ( 5 ) = 63.34 , p &lt; 0.001</i> |                            |                            |                              |
| <i>Consistency: X<sup>2</sup> ( 2 ) = 8.25 , p = 0.016</i>                                                    |                            |                            |                              |

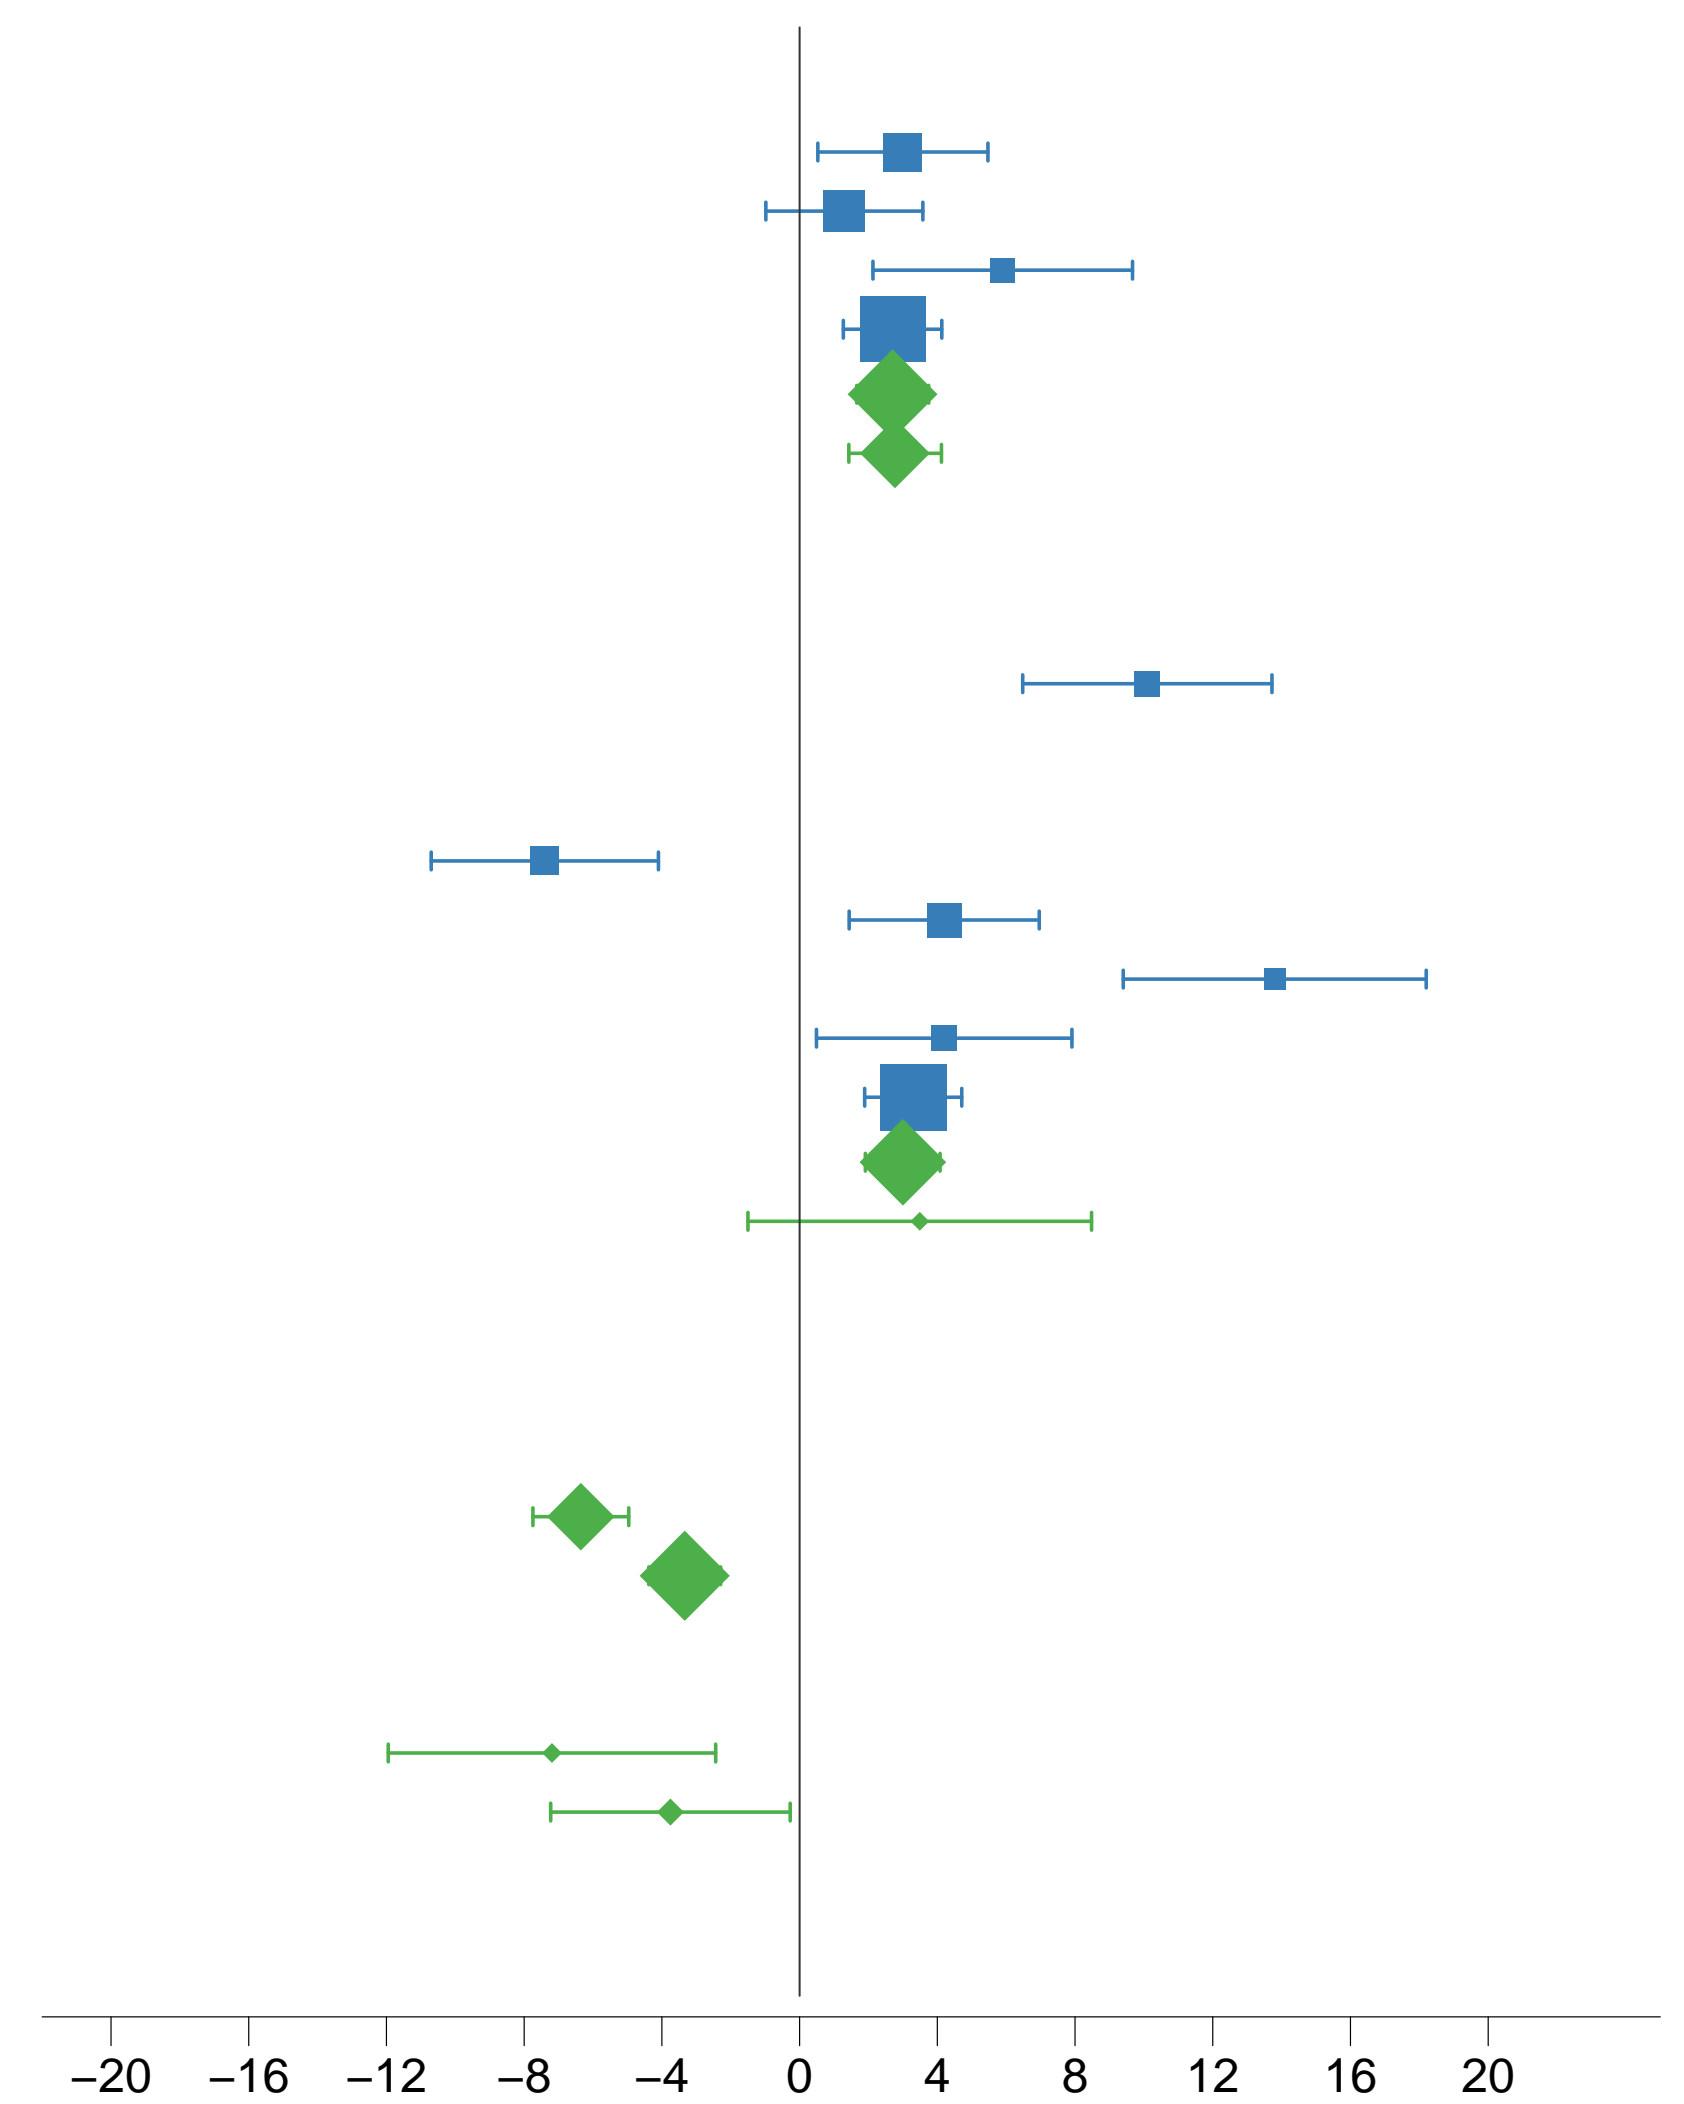

Supplement: MOESM11 [file 25967174]
