# Supplementary material for: Cannulated screws versus dynamic hip screw versus hemiarthroplasty versus total hip arthroplasty in patients with displaced and non-displaced femoral neck fractures: a systematic review and frequentist network meta-analysis of 5703 patients
Source: Springer Nature journal article supplement (doi:10.1186/s13018-023-04114-8), 2023-08-26

|                                                                                                               | Mean (SD) / Patients       | Mean (SD) / Patients      | MD (95% CI)                    |
|---------------------------------------------------------------------------------------------------------------|----------------------------|---------------------------|--------------------------------|
| <b>HA vs CS</b>                                                                                               |                            |                           |                                |
| Frihagen et al. 2007                                                                                          | 10.2 ( 11.9 ) / 110        | 8.2 ( 7.4 ) / 112         | 2.00 ( -0.62 ; 4.62 )          |
| Roden et al. 2003                                                                                             | 15.0 ( 8.3 ) / 47          | 15.0 ( 5.6 ) / 53         | 0.00 ( -2.80 ; 2.80 )          |
| <b>Fixed effects model</b>                                                                                    | <b>11.6 ( 11.2 ) / 157</b> | <b>10.4 ( 7.6 ) / 165</b> | <b>1.07 ( -0.85 ; 2.98 )</b>   |
| <b>Random effects model</b>                                                                                   | <b>11.6 ( 11.2 ) / 157</b> | <b>10.4 ( 7.6 ) / 165</b> | <b>1.07 ( -0.89 ; 3.02 )</b>   |
| <i>Heterogeneity: I<sup>2</sup> = 4 %, t<sup>2</sup> = 0.1 , X<sup>2</sup> ( 1 ) = 1.04 , p = 0.307</i>       |                            |                           |                                |
| <b>THA vs CS</b>                                                                                              |                            |                           |                                |
| Jonsson et al. 1996                                                                                           | 15.0 ( 5.9 ) / 25          | 12.0 ( 5.6 ) / 25         | 3.00 ( -0.20 ; 6.20 )          |
| <b>HA vs DHS</b>                                                                                              |                            |                           |                                |
| Davison et al. 2001                                                                                           | 15.0 ( 8.3 ) / 187         | 14.0 ( 2.8 ) / 93         | 1.00 ( -0.31 ; 2.31 )          |
| Mouzopoulos et al. 2008                                                                                       | 9.1 ( 3.4 ) / 34           | 13.0 ( 2.8 ) / 38         | -3.90 ( -5.44 ; -2.36 )        |
| <b>Fixed effects model</b>                                                                                    | <b>14.1 ( 8.0 ) / 221</b>  | <b>13.7 ( 2.8 ) / 131</b> | <b>-1.07 ( -2.07 ; -0.07 )</b> |
| <b>Random effects model</b>                                                                                   | <b>14.1 ( 8.0 ) / 221</b>  | <b>13.7 ( 2.8 ) / 131</b> | <b>-1.43 ( -6.24 ; 3.37 )</b>  |
| <i>Heterogeneity: I<sup>2</sup> = 96 %, t<sup>2</sup> = 11.5 , X<sup>2</sup> ( 1 ) = 24.10 , p &lt; 0.001</i> |                            |                           |                                |
| <b>THA vs DHS</b>                                                                                             |                            |                           |                                |
| Mouzopoulos et al. 2008                                                                                       | 8.3 ( 6.2 ) / 37           | 13.0 ( 2.8 ) / 38         | -4.70 ( -7.38 ; -2.02 )        |
| <b>THA vs HA</b>                                                                                              |                            |                           |                                |
| Cadossi et al. 2013                                                                                           | 9.9 ( 5.9 ) / 47           | 8.7 ( 8.3 ) / 49          | 1.20 ( -1.67 ; 4.07 )          |
| Iorio et al. 2019                                                                                             | 6.1 ( 5.9 ) / 30           | 5.5 ( 8.3 ) / 30          | 0.60 ( -3.04 ; 4.24 )          |
| Macaulay et al. 2007                                                                                          | 7.7 ( 5.5 ) / 17           | 5.4 ( 2.8 ) / 23          | 2.30 ( -0.55 ; 5.15 )          |
| Mouzopoulos et al. 2008                                                                                       | 8.3 ( 6.2 ) / 37           | 9.1 ( 3.4 ) / 34          | -0.80 ( -4.25 ; 2.65 )         |
| Parker et al. 2019                                                                                            | 14.5 ( 5.9 ) / 52          | 9.2 ( 8.3 ) / 53          | 5.30 ( 2.55 ; 8.05 )           |
| Schleicher et al. 2003                                                                                        | 19.0 ( 5.9 ) / 54          | 20.5 ( 8.3 ) / 52         | -1.50 ( -4.25 ; 1.25 )         |
| Sharma et al. 2016                                                                                            | 14.0 ( 5.9 ) / 40          | 14.0 ( 8.3 ) / 40         | 0.00 ( -3.16 ; 3.16 )          |
| van den Bekerom et al. 2010                                                                                   | 18.4 ( 5.9 ) / 115         | 17.1 ( 8.3 ) / 137        | 1.30 ( -0.46 ; 3.06 )          |
| <b>Fixed effects model</b>                                                                                    | <b>14.1 ( 7.5 ) / 392</b>  | <b>13.1 ( 9.2 ) / 418</b> | <b>1.22 ( 0.26 ; 2.17 )</b>    |
| <b>Random effects model</b>                                                                                   | <b>14.1 ( 7.5 ) / 392</b>  | <b>13.1 ( 9.2 ) / 418</b> | <b>1.14 ( -0.30 ; 2.58 )</b>   |
| <i>Heterogeneity: I<sup>2</sup> = 57 %, t<sup>2</sup> = 2.4 , X<sup>2</sup> ( 7 ) = 16.26 , p = 0.023</i>     |                            |                           |                                |
| <b>NETWORK META-ANALYSIS</b>                                                                                  |                            |                           |                                |
| <b>Fixed effects model</b>                                                                                    |                            |                           |                                |
| CS                                                                                                            | 10.6 ( 7.3 ) / 190         |                           | -2.16 ( -3.93 ; -0.40 )        |
| DHS                                                                                                           | 13.7 ( 2.8 ) / 169         |                           | 0.81 ( -0.40 ; 2.03 )          |
| HA                                                                                                            | 13.3 ( 9.5 ) / 796         |                           | -0.80 ( -1.68 ; 0.09 )         |
| THA                                                                                                           | 14.2 ( 7.4 ) / 454         |                           | 0.00 ( Reference )             |
| <b>Random effects model</b>                                                                                   |                            |                           |                                |
| CS                                                                                                            | 10.6 ( 7.3 ) / 190         |                           | -2.26 ( -5.67 ; 1.14 )         |
| DHS                                                                                                           | 13.7 ( 2.8 ) / 169         |                           | 1.27 ( -2.22 ; 4.76 )          |
| HA                                                                                                            | 13.3 ( 9.5 ) / 796         |                           | -0.91 ( -2.74 ; 0.92 )         |
| THA                                                                                                           | 14.2 ( 7.4 ) / 454         |                           | 0.00 ( Reference )             |
| <i>Heterogeneity: I<sup>2</sup> = 79 %, t<sup>2</sup> = 5.7 , X<sup>2</sup> ( 7 ) = 14.39 , p = 0.045</i>     |                            |                           |                                |
| <i>Consistency: X<sup>2</sup> ( 3 ) = 34.26 , p &lt; 0.001</i>                                                |                            |                           |                                |

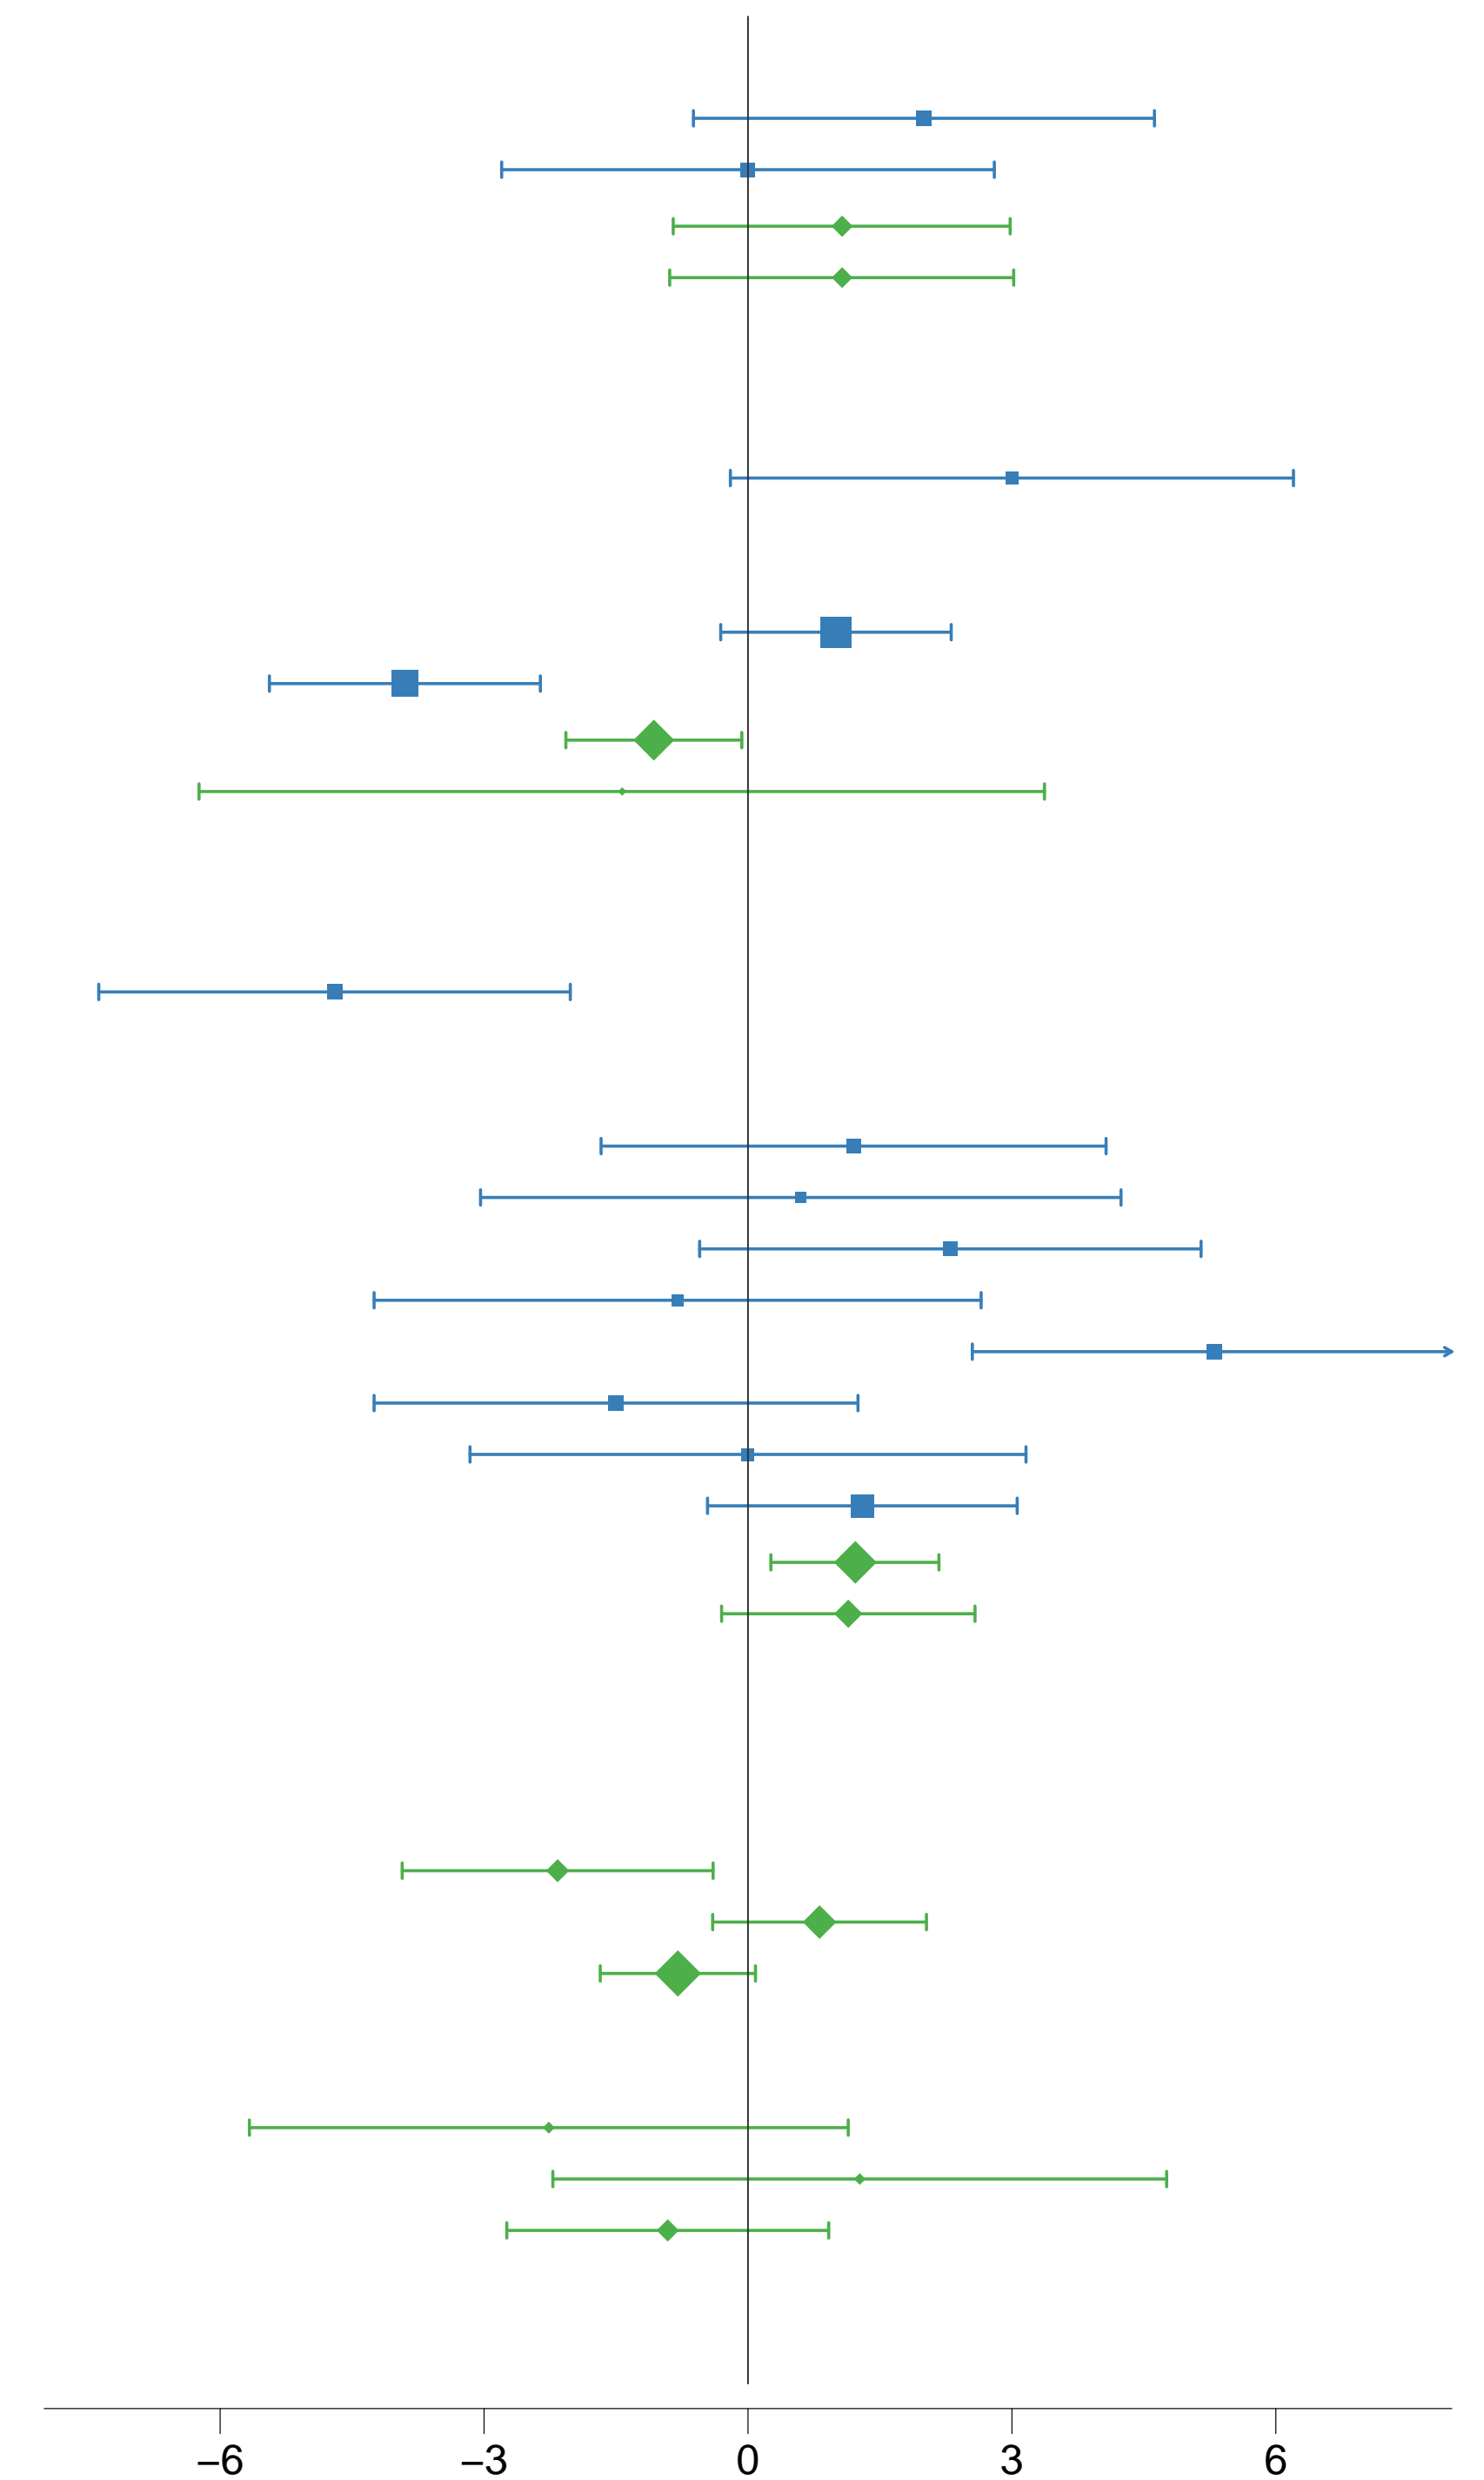

Supplement: MOESM12 [file 25967174]
