# Supplementary material for: Cannulated screws versus dynamic hip screw versus hemiarthroplasty versus total hip arthroplasty in patients with displaced and non-displaced femoral neck fractures: a systematic review and frequentist network meta-analysis of 5703 patients
Source: Springer Nature journal article supplement (doi:10.1186/s13018-023-04114-8), 2023-08-26

|                                                                                                         | Mean (SD) / Patients     | Mean (SD) / Patients     | MD (95% CI)                  |
|---------------------------------------------------------------------------------------------------------|--------------------------|--------------------------|------------------------------|
| HA vs CS<br>Frihagen et al. 2007                                                                        | 0.7 ( 0.3 ) / 110        | 0.6 ( 0.3 ) / 112        | 0.09 ( 0.01 ; 0.17 )         |
| THA vs HA<br>Chammout et al. 2019                                                                       | 0.7 ( 0.3 ) / 60         | 0.7 ( 0.3 ) / 60         | 0.02 ( -0.08 ; 0.12 )        |
| Hedbeck et al. 2011                                                                                     | 0.7 ( 0.3 ) / 60         | 0.6 ( 0.3 ) / 60         | 0.05 ( -0.05 ; 0.15 )        |
| <b>Fixed effects model</b>                                                                              | <b>0.7 ( 0.3 ) / 120</b> | <b>0.6 ( 0.3 ) / 120</b> | <b>0.03 ( -0.04 ; 0.11 )</b> |
| <b>Random effects model</b>                                                                             | <b>0.7 ( 0.3 ) / 120</b> | <b>0.6 ( 0.3 ) / 120</b> | <b>0.03 ( -0.04 ; 0.11 )</b> |
| <i>Heterogeneity: I<sup>2</sup> = 0 %, t<sup>2</sup> = 0.0 , X<sup>2</sup> ( 1 ) = 0.16 , p = 0.686</i> |                          |                          |                              |

#### NETWORK META-ANALYSIS

##### Fixed effects model

|     |                   |                         |
|-----|-------------------|-------------------------|
| CS  | 0.6 ( 0.3 ) / 112 | -0.12 ( -0.24 ; -0.01 ) |
| HA  | 0.6 ( 0.3 ) / 230 | -0.03 ( -0.11 ; 0.04 )  |
| THA | 0.7 ( 0.3 ) / 120 | 0.00 ( Reference )      |

##### Random effects model

|     |                   |                         |
|-----|-------------------|-------------------------|
| CS  | 0.6 ( 0.3 ) / 112 | -0.12 ( -0.24 ; -0.01 ) |
| HA  | 0.6 ( 0.3 ) / 230 | -0.03 ( -0.11 ; 0.04 )  |
| THA | 0.7 ( 0.3 ) / 120 | 0.00 ( Reference )      |

*Heterogeneity: I<sup>2</sup> = 0 %, t<sup>2</sup> = 0.0 , X<sup>2</sup> ( 1 ) = 0.16 , p = 0.686*

*Consistency: X<sup>2</sup> ( 0 ) = 0.00 , p = NA*

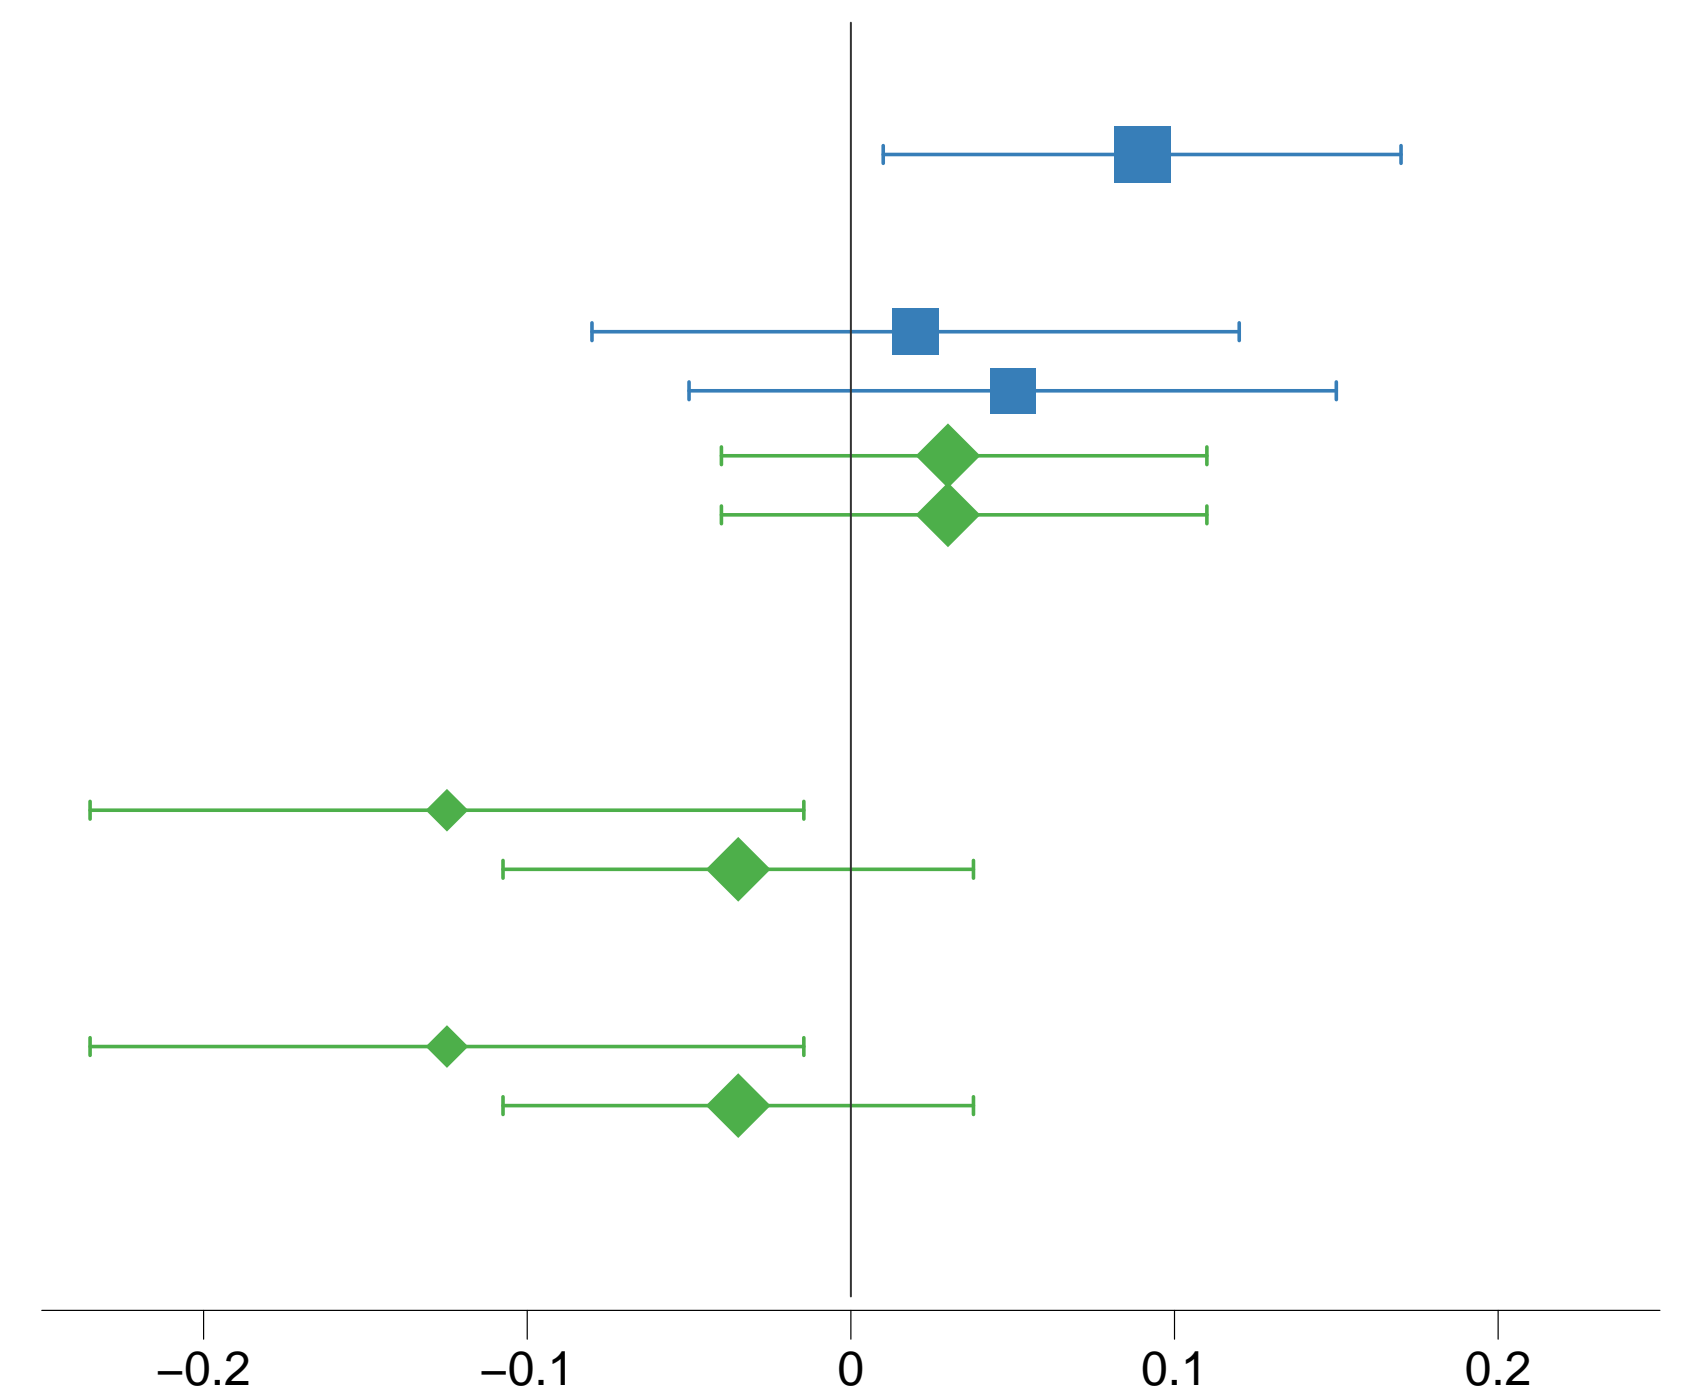

Supplement: MOESM6 [file 25967174]
