# Supplementary material for: Cannulated screws versus dynamic hip screw versus hemiarthroplasty versus total hip arthroplasty in patients with displaced and non-displaced femoral neck fractures: a systematic review and frequentist network meta-analysis of 5703 patients
Source: Springer Nature journal article supplement (doi:10.1186/s13018-023-04114-8), 2023-08-26

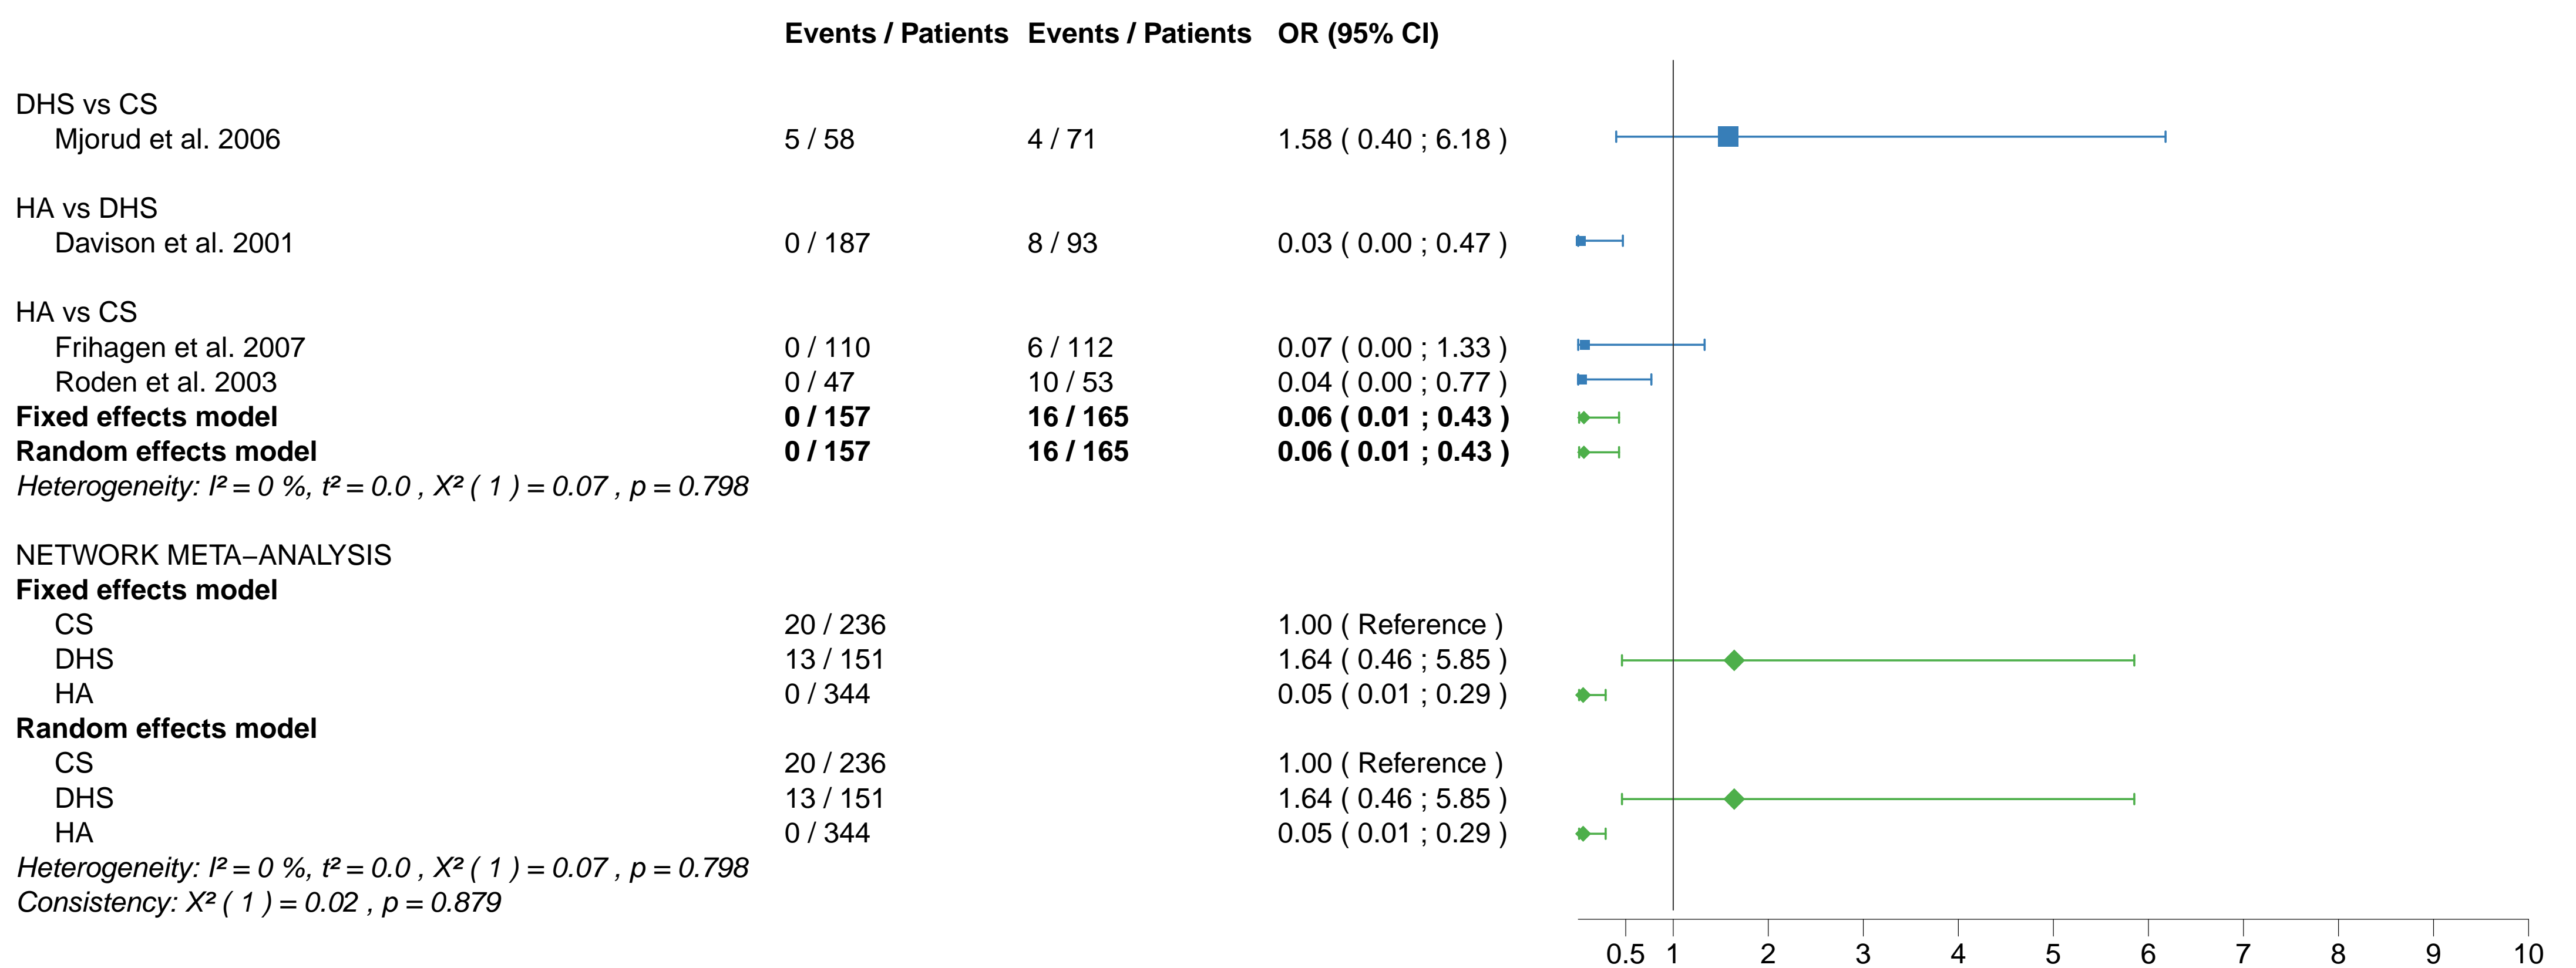

Supplement: MOESM17 [file 25967174]
